1 **Inhalable textile microplastic fibers impair lung repair**

3 **Short title: Textile microplastic fibers impair organoid growth**

5 F. van Dijk<sup>1,2</sup>, S. Song<sup>1,3</sup>, G.W.A van Eck<sup>1</sup>, X. Wu<sup>1,2</sup>, I.S.T. Bos<sup>1</sup>, D.H.A. Boom<sup>4</sup>, I.M. Kooter<sup>4</sup>,  
6 D.C.J. Spierings<sup>5</sup>, R. Wardenaar<sup>5</sup>, M. Cole<sup>6</sup>, A. Salvati<sup>7</sup>, R. Gosens<sup>1,2</sup>, B.N. Melgert<sup>1,2,\*</sup>

8 <sup>1</sup>Groningen Research Institute for Pharmacy, Department of Molecular Pharmacology,  
9 University of Groningen, Groningen, the Netherlands.

10 <sup>2</sup>Groningen Research Institute for Asthma and COPD, University Medical Center Groningen,  
11 University of Groningen, Groningen, the Netherlands.

12 <sup>3</sup>Groningen Research Institute for Pharmacy, Department of Chemical and Pharmaceutical  
13 Biology, University of Groningen, Groningen, the Netherlands.

14 <sup>4</sup>The Netherlands Organization for Applied Scientific Research, TNO, Utrecht, the  
15 Netherlands.

16 <sup>5</sup>European Research Institute for the Biology of Ageing, University Medical Center  
17 Groningen, University of Groningen, Groningen, the Netherlands.

18 <sup>6</sup>Plymouth Marine Laboratory, Plymouth, United Kingdom.

19 <sup>7</sup>Groningen Research Institute for Pharmacy, Department of Nanomedicine & Drug  
20 Targeting, University of Groningen, Groningen, the Netherlands.

21  
22 \* Corresponding author:

23 Prof Dr Barbro N. Melgert

24 Groningen Research Institute of Pharmacy

25 Department of Molecular Pharmacology

26 University of Groningen

27 A. Deusinglaan 1

28 9713 AV Groningen

29 the Netherlands

30 b.n.melgert@rug.nl

31 **Abstract**

32 Synthetic textiles shed fibers that accumulate indoors and this results in continuous  
33 exposure when indoors. High exposure to microplastic fibers in nylon flock workers has  
34 been linked to the development of airway and interstitial lung disease, but the exact  
35 health effects of microplastic fibers on the lungs are unknown. Here we determined effects  
36 of polyester and nylon textile microplastic fibers on airway and alveolar epithelial cells  
37 using human and murine lung organoids. We observed that particularly nylon microfibers  
38 had a negative impact on the growth and development of airway organoids. We  
39 demonstrated that this effect was mediated by components leaking from nylon.  
40 Moreover, our data suggested that microplastic textile fibers may especially harm the  
41 developing airways or airways undergoing repair. Our results call for a need to assess  
42 exposure and inhalation levels in indoor environments to accurately determine the actual  
43 risk of these fibers to human health.

44

45

46 **Teaser**

47 Airborne fibers shed from synthetic textiles, in particular nylon, can inhibit repair of the cells  
48 coating the airways

49

## 50 Introduction

51 Plastic pollution is a pressing global concern and microplastics are a significant part of this  
52 problem (1). High amounts of microplastics have been found in marine environments, air,  
53 soils, plants, and animals, which illustrates how omnipresent this relatively recent  
54 pollution actually is (2). Microplastic pollution derives from personal care products,  
55 synthetic clothes, and degradation of macroplastics (3, 4). Synthetic textile fibers are one  
56 of the most prevalent types of microplastic waste observed, with an annual production of  
57 60 million metric tons, which equals 16% of the world's plastic pollution (1). These fibers  
58 are typically composed of nylon or polyester and are released into the environment by  
59 wear and tear and during washing and drying of garments (4-6).

60 The ubiquitous nature of microplastics in the environment inevitably leads to human  
61 exposure, which can occur through two main routes (7, 8). Firstly, through ingestion of  
62 contaminated food and water and secondly via inhalation. Microplastics have been  
63 reported both in indoor and outdoor air, with levels indoors being 2-5 times higher as  
64 compared to outdoors (9, 10). Whether or not microfibers can deposit in lung tissue  
65 largely depends on the aerodynamic diameter of the fibers (7, 11). Lung deposition is most  
66 efficiently achieved with aerodynamic diameters between 1-10  $\mu\text{m}$  (12), however, these  
67 sizes are difficult to quantify in environmental samples due to limitations of the analytical  
68 techniques (9, 13). Yet, plastic microfibers have been found in human lung tissue,  
69 suggesting inhalation does indeed take place (14). Furthermore, several studies from  
70 workers in synthetic textile, flock and (poly)vinyl chloride industries suggest that inhalation  
71 of such microfibers is harmful, as around 30% of factory workers developed work-related  
72 airway and interstitial lung disease (15-23). Moreover, exposure to particulate matter in air  
73 pollution, also containing microplastics (24-26), has been associated with higher risk of  
74 developing asthma and an increase in asthma symptoms in areas with higher levels of  
75 particulate matter air pollution (27-29).

76 Despite the potential capacity for microplastic fibers to contribute to respiratory diseases,  
77 the health effects are greatly understudied and information providing evidence of  
78 potential human health effects of inhaled microplastics is lacking (9, 30, 31). In the present  
79 study, we therefore explored whether textile microplastic fibers can cause damage to lung  
80 tissue. As epithelial cells are the first to come into contact with inhaled fibers, we

81 investigated effects of polyester and nylon microfibers on lung epithelial proliferation,  
82 differentiation, and repair processes. For this we used lung organoids that are grown from  
83 primary lung epithelial progenitor cells with support of a lung fibroblast cell line (32, 33).  
84 The epithelial progenitors can develop into organoids consisting of alveolar epithelial cells  
85 or organoids consisting of airway epithelial cells with help of growth factors produced by  
86 fibroblasts. We found that in particular nylon microfibers negatively impacted developing  
87 airway organoids, while developing alveolar organoids and already developed organoids of  
88 both types appeared to be less affected. This negative effect was caused by still unknown  
89 leachates from nylon that particularly inhibit differentiation of airway epithelial cells. We  
90 therefore call for assessment of exposure levels in indoor environments and actual lung  
91 deposition to accurately determine the risk of these fibers to human health.

92

## 93 Results

### 94 Characterization of reference microfibers

95 To produce reference textile fibers that resemble microplastics found in our indoor  
96 environments, we used a method previous described by us to reproducibly generate fibers  
97 of specific lengths (34). We particularly focused on polyester and nylon, because these are  
98 the most abundant types of microplastics indoors (9, 35-38). As we spend the majority of  
99 our time indoors, we may therefore be exposed most to these types of microplastics (39).  
00 Fibers are commonly defined as having a length to diameter ratio of 3:1 (40). The fibers we  
01 produced had a median size of 15x52  $\mu\text{m}$  for polyester and 12x31  $\mu\text{m}$  for nylon (Table S1).  
02 Using scanning electron microscopy (SEM) we found these fibers to be rod-shaped with a  
03 circular cross-section and had a smooth surface (Figure 1A and B). For our polyester fibers  
04 energy dispersive X-ray (EDX) analysis confirmed the presence of carbon and oxygen  
05 (Figure S1A). The recorded micro-Fourier transform infrared ( $\mu\text{FTIR}$ ) spectrum showed  
06 characteristic absorbance peaks of polyester (Figure S1B). The EDX spectrum for nylon  
07 confirmed the presence of carbon, nitrogen and oxygen (Figure S1C) and the  $\mu\text{FTIR}$   
08 spectrum showed characteristic nylon absorbance peaks (Figure S1D).

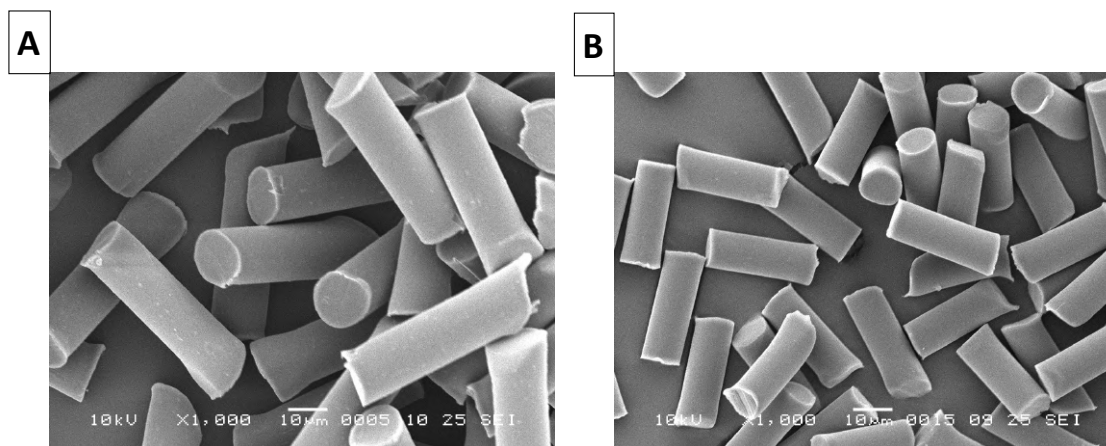

09  
10 **Figure 1. Morphology of reference microplastic fibers of standardized dimensions.**  
11 *Representative SEM micrographs of (A) polyester microfibers (15x52  $\mu\text{m}$ ) and (B) nylon*  
12 *microfibers (12x31  $\mu\text{m}$ ).*

13

## 14 **Nylon microfibers inhibited growth of murine and human lung organoids**

15 Possible effects of microplastic fibers on lung epithelial proliferation, differentiation, and  
16 repair processes were assessed *in vitro* using both murine and a human lung organoids.  
17 Airways are lined with ciliated pseudostratified epithelium consisting of basal cells, ciliated  
18 cells, and secretory cells like goblet cells and club cells, while alveoli consist of alveolar  
19 epithelial cells type I and II (AECI and AECII). Basal cells and club cells have stem cell-like  
20 abilities and basal cells can give rise to all important epithelial cells lining the airways,  
21 while club cells can develop into ciliated cells, goblet cells, and AECII (41, 42). AECII can  
22 behave as alveolar stem cells and can proliferate and develop into AECI (43). The lung  
23 organoids we used in these studies self-assemble from the lung epithelial progenitor/stem  
24 cells isolated from adult lung tissue, i.e. basal cells, club cells and AECII. The growth of  
25 organoids from these progenitor cells is supported by proliferation and differentiation  
26 enhancers produced by epithelial cells themselves and fibroblasts also present in our 3D  
27 cultures (43).

28 We first assessed the effects of several doses of fibers on organoid growth ranging from  
29 2000-5000 fibers per well (Figure S2). The fibers were dispersed into liquid Matrigel at the  
30 same time as the isolated epithelial cells and fibroblasts were added, after which the  
31 Matrigel solidifies and epithelial progenitors start to form organoids. Based on these  
32 results we continued with 5000 polyester or 5000 nylon fibers per well, equivalent to 122  
33  $\mu\text{g/ml}$  polyester and 39  $\mu\text{g/ml}$  nylon, as this concentration had clear effects and was on the  
34 lower end of the spectrum of concentrations used in other studies (7).

35 Murine lung organoids develop into two distinct phenotypes, i.e. acetylated  $\alpha$ -tubulin-  
36 positive airway organoids (Figure 2A) and prosurfactant protein C-positive alveolar  
37 organoids (Figure 2B). We assessed the effects of the two types of fibers on these two  
38 structures separately. Exposure during 14 days to either polyester or nylon microfibers  
39 resulted in significantly fewer organoids (Figure 2C) compared to untreated controls  
40 (Figure 2D and E). The effect of nylon on airway organoids was most profound of the two  
41 types of plastic and the two types of structures. Moreover, both airway and alveolar  
42 organoids were significantly smaller in size following nylon microfiber exposure as  
43 compared to untreated controls (Figure 2F and G).

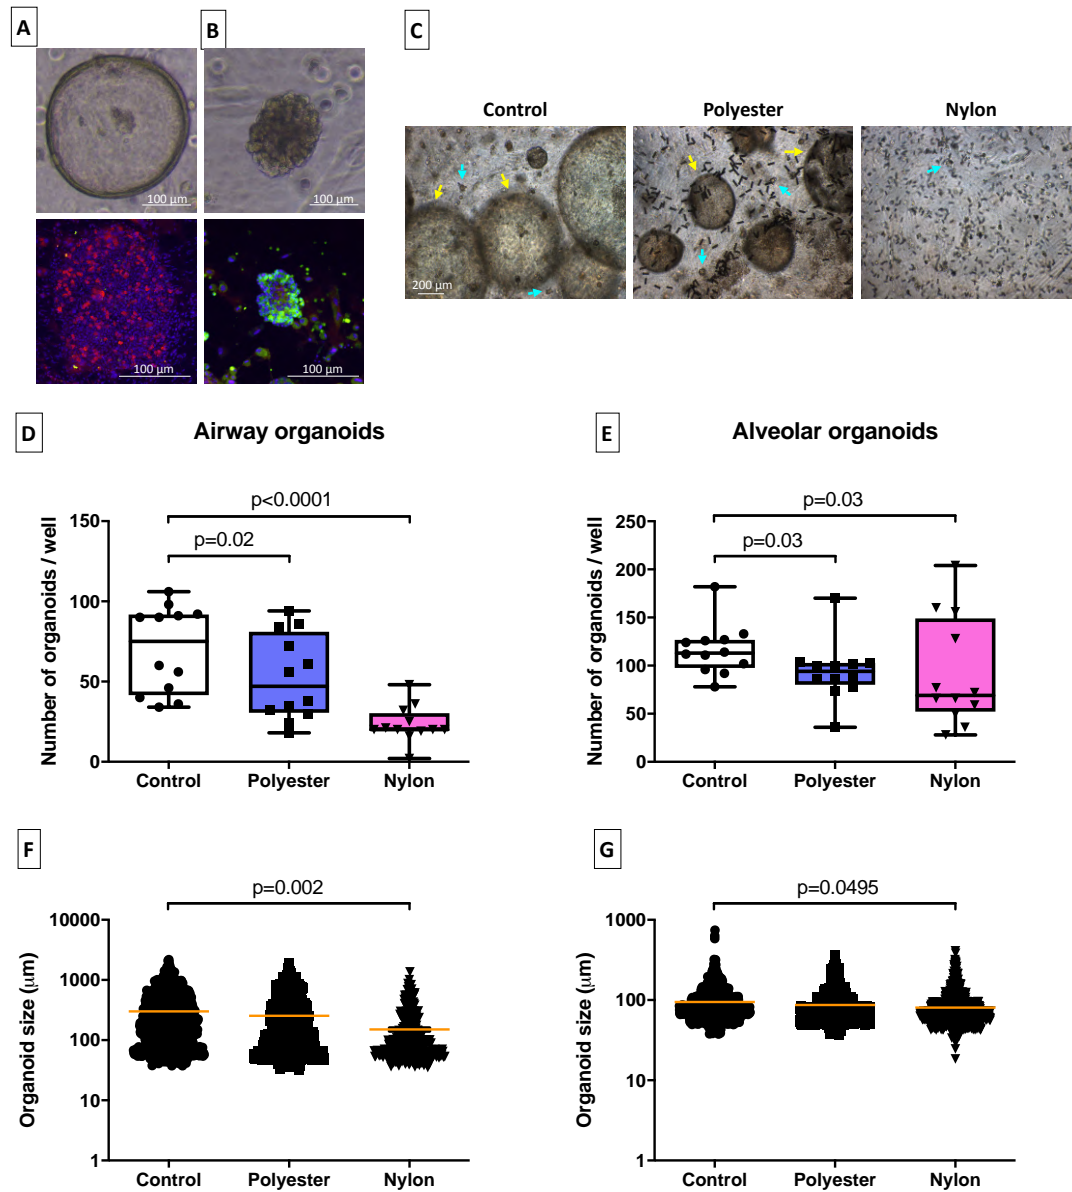

44  
45 **Figure 2. Effects of microplastic fibers on growth of murine lung organoids.** Light  
46 microscopy images and fluorescence photographs of (A) acetylated  $\alpha$ -tubulin-positive  
47 airway organoids (red) and (B) prosurfactant protein C-positive alveolar organoids (green).  
48 Nuclei were counterstained with DAPI (blue). (C) Representative light microscopy images of  
49 the different treatment conditions. Yellow arrows in the light microscopy images indicate  
50 airway organoids, whereas cyan arrows indicate alveolar organoids. (D and E)  
51 Quantification of the numbers and (F and G) quantification of the sizes of airway and  
52 alveolar lung organoids exposed for 14 days to no fibers, 5000 polyester, or 5000 nylon  
53 fibers (equivalent to 122  $\mu\text{g}/\text{ml}$  polyester or 39  $\mu\text{g}/\text{ml}$  nylon,  $n=12$  independent isolations).  
54 Groups were compared using a Friedman test with Dunn's correction for multiple testing.  
55  $P<0.05$  was considered significant.



56 Similar results were observed in human lung organoids, that mainly develop into alveolar  
57 organoids or mixed alveolar/airway organoids positive (Figure 3A). 14 day-exposure to  
58 nylon microfibrers resulted in significantly fewer human lung organoids (Figure 3B and C),  
59 whereas the effects of polyester on organoid growth were less profound. The size of the  
60 organoids was not affected by the presence of nylon microfibrers (Figure 3D).

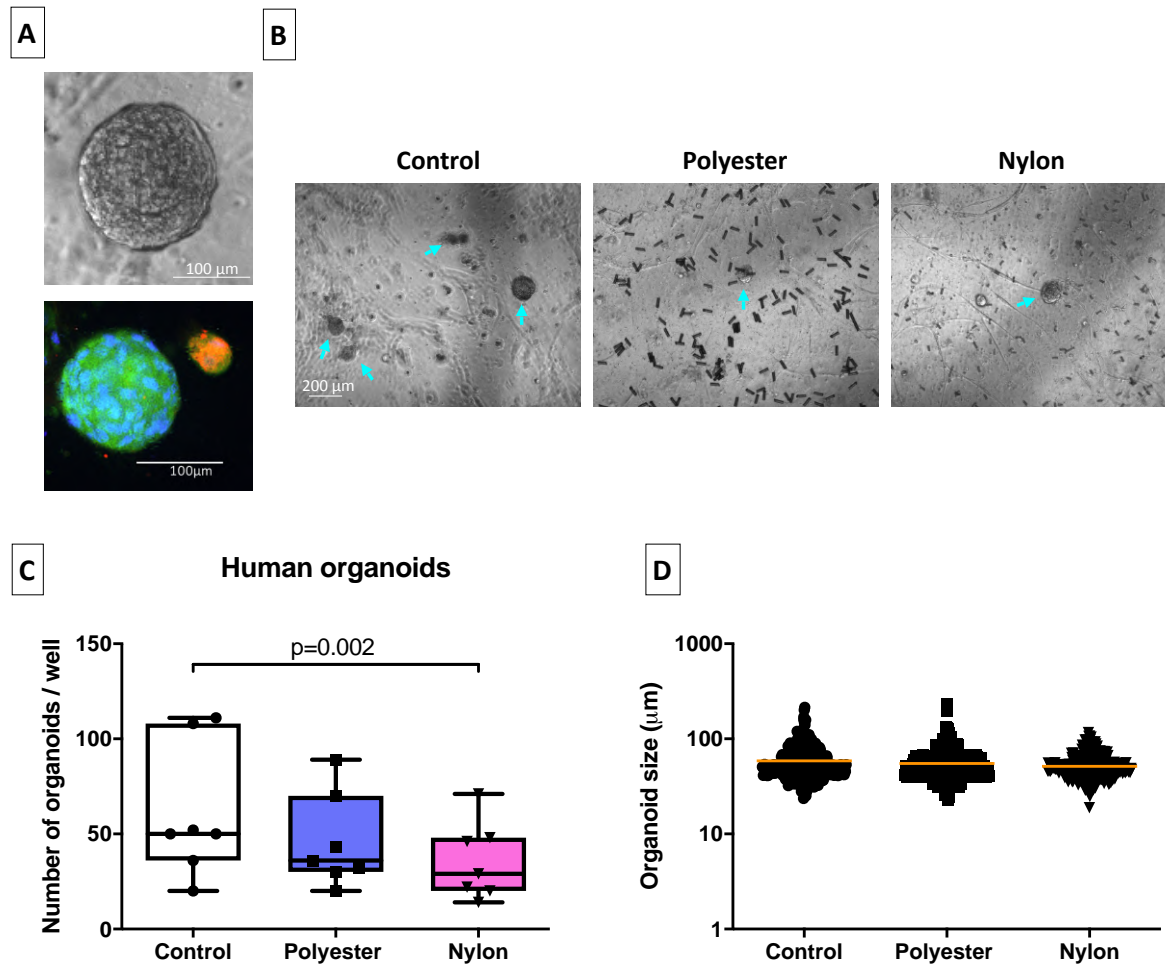

61 **Figure 3. Influence of microplastic fibers on growth of human lung organoids.** (A) The  
62 morphology of the alveolar prosurfactant protein C-positive organoids (green) and mixed  
63 acetylated  $\alpha$ -tubulin/prosurfactant protein C-positive organoids (orange) as shown by light  
64 and fluorescence microscopy. Nuclei were counterstained with DAPI (blue). (B)  
65 Representative light microscopy images of all treatment conditions. Cyan arrows indicate  
66 lung organoids. (C) Quantification of the numbers and (D) sizes of human lung organoids  
67 following 14-day exposure to either no microfibrers, 5000 polyester, or 5000 nylon fibers  
68 (equivalent to 122 μg/ml polyester or 39 μg/ml nylon, n=7 independent isolations). Groups



69 were compared using a Friedman test with Dunn's correction for multiple testing.  $P < 0.05$   
70 was considered significant.

### 71 Environmental microplastic fibers impaired lung organoid growth as well

72 Having observed these effects after exposure to reference microfibers, we next performed  
73 similar experiments using environmentally relevant polyester and nylon fibers on murine  
74 lung organoids. These were made from white polyester and nylon fabrics purchased in a  
75 local fabric store and cut to sizes approximating the reference fibers. First, we  
76 characterized morphology and chemical composition of these fibers. For polyester, we  
77 observed a more heterogeneous size distribution as compared to the reference fibers,  
78 with fibers having a median size of  $17 \times 63 \mu\text{m}$  (Figure 4A, Table S2), but a comparable EDX  
79 and  $\mu\text{FTIR}$  spectrum (Figure S3A and B). The nylon fibers had a disk-shaped appearance but  
80 similar dimensions as the reference nylon fibers (median  $57 \times 20 \mu\text{m}$ , Table S2). The EDX  
81 analysis revealed the expected C, N and O peaks for nylon (Figure S3C) and the  $\mu\text{FTIR}$   
82 spectrum showed characteristic nylon absorbance peaks (Figure S3D).

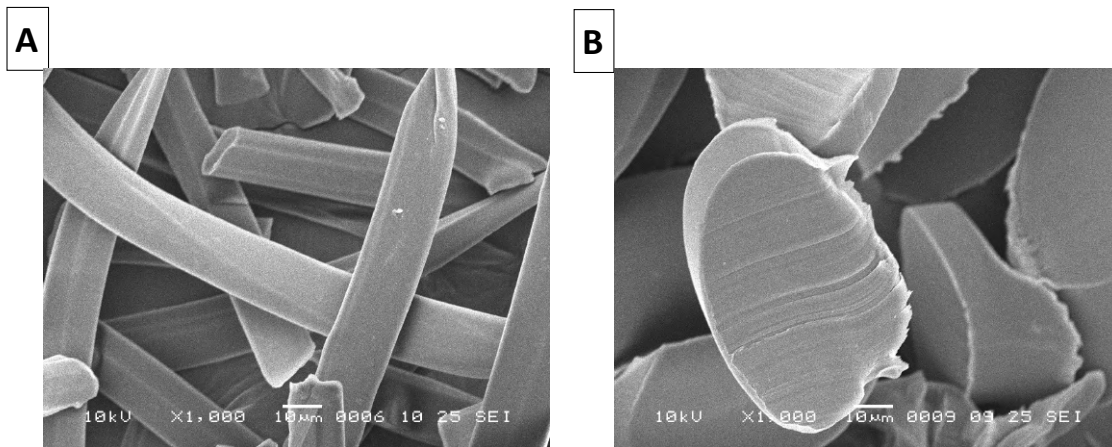

83  
84 **Figure 4. Morphology of environmental microplastic fibers.** Representative SEM pictures  
85 of (A) polyester microfibers ( $17 \times 63 \mu\text{m}$ ) and (B) nylon microfibers ( $57 \times 20 \mu\text{m}$ ).  
86

87 As observed with the reference fibers, exposure to environmental nylon microfibers  
88 resulted in markedly fewer lung organoids (Figure 5A, B and C) as well as smaller organoids  
89 (Figure 5D and E).

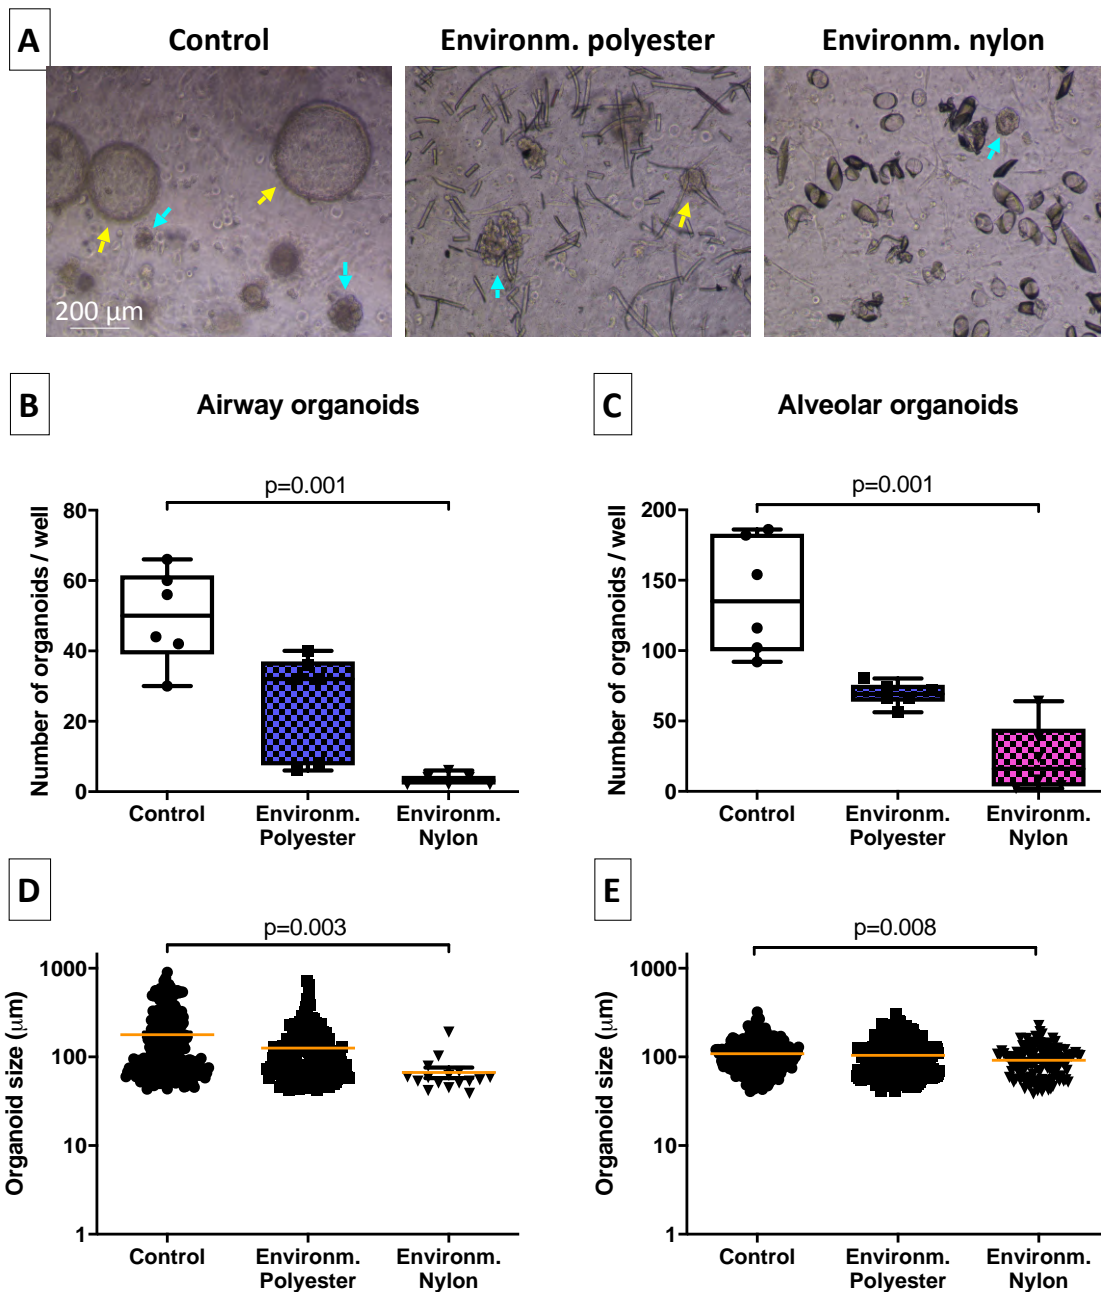

90  
91 **Figure 5: Effect of environmentally relevant textile fibers on growth of murine lung**  
92 **organoids.** (A) Representative light microscopy images of all treatment conditions. Yellow  
93 arrows in the light microscopy images indicate airway organoids, whereas cyan arrows  
94 indicate alveolar organoids. (B and C) Quantification of the numbers and (D and E) sizes of  
95 airway and alveolar organoids ( $n=6$  independent isolations) following 14-day exposure to  
96 either no microfibers, 5000 polyester or 5000 nylon microfibers (approximately equivalent  
97 to 189  $\mu\text{g}/\text{ml}$  polyester or 531  $\mu\text{g}/\text{ml}$  nylon). Groups were compared using a Friedman test  
98 with Dunn's correction for multiple testing.  $P<0.05$  was considered significant.  
99

## 00 **Leaching nylon components caused a reduction in lung organoid growth**

01 Since organoid growth was most affected by nylon, both reference and environmentally  
02 relevant fibers, we investigated whether this inhibition was caused by the physical  
03 presence of fibers nearby the cells or by leaching components from these nylon fibers.  
04 Therefore, we added nylon reference microfibers either on top of the Matrigel after it had  
05 set, thereby preventing direct contact with the cells, or added leachate of these fibers to  
06 the medium surrounding the Matrigel for 14 days. Interestingly, even when excluding  
07 physical contact between the fibers and the cells or simply exposing the cells to medium  
08 with leachate, the same effects on airway organoids were observed as when the forming  
09 organoids were directly exposed to the fibers. We found significantly fewer airway  
10 organoids in the presence of nylon microfibers on top of the gel or their leachate (Figure  
11 6A and B) compared to having the fibers inside the Matrigel. The number of alveolar  
12 organoids, on the other hand, was unaffected (fibers on top) or even induced (leachate,  
13 Figure 6A and C) compared to having the fibers inside the Matrigel. Additionally, the size of  
14 these airway organoids was smaller as compared to untreated control organoids (Figure  
15 6D), while only slightly inhibiting the size of the alveolar organoids (Figure 6E). These data  
16 suggest that specifically airway epithelial growth is inhibited by components leaching from  
17 nylon microplastics.

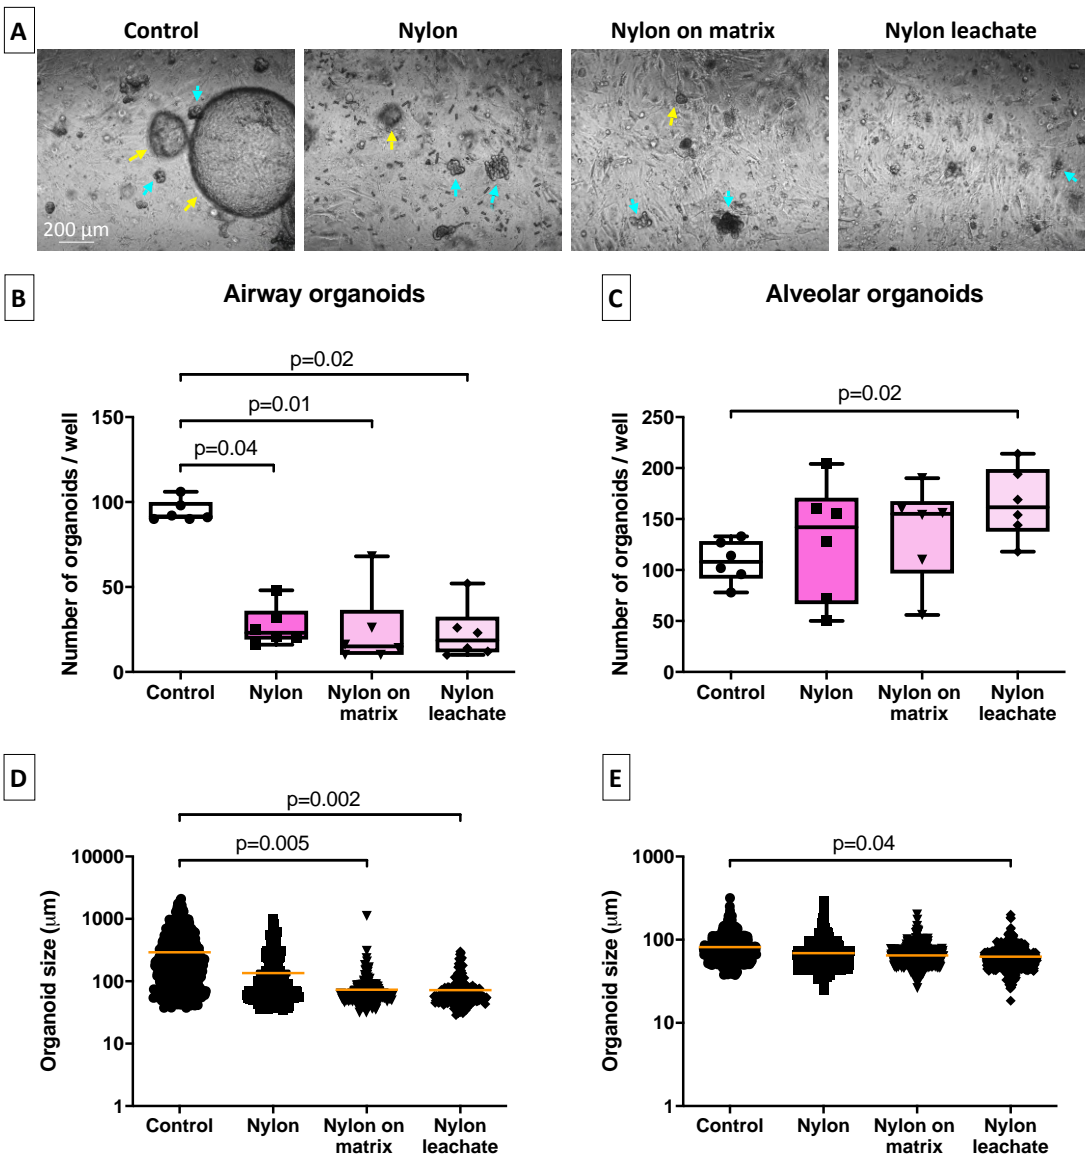

18  
19 **Figure 6. Impact of nylon reference microfibers and their leaching components on growth**  
20 **of murine lung organoids. (A)** Representative light microscopy images of all treatment  
21 conditions. Yellow arrows in the light microscopy images indicate airway organoids,  
22 whereas cyan arrows indicate alveolar organoids. **(B and C)** Quantification of the numbers  
23 and **(D and E)** sizes of airway and alveolar organoids following either direct exposure to  
24 5000 nylon microfibers or indirect exposure to nylon by adding 5000 microfibers  
25 (equivalent to 39  $\mu\text{g}/\text{ml}$  nylon) on top of the Matrigel or by adding nylon leachate to the  
26 culture medium ( $n=6$  independent isolations). Groups were compared using a Friedman  
27 test with Dunn's correction for multiple testing.  $P<0.05$  was considered significant.

29 The strong effects observed with the leachate suggested that some components and/or  
30 degradation products may leak and/or form during fiber ageing at 37C. Thus in order to  
31 determine the chemical identity of the components leaching from nylon reference  
32 microfibers we used mass spectrometry analysis. This revealed high concentrations of  
33 cyclic nylon oligomers (mono-, di- and trimers) in the leachate of nylon microfibers (Figure  
34 S4A), which are known to develop as by-products during the production of nylon (44).  
35 However, when exposing murine lung organoids to different concentrations of these  
36 isolated oligomers separately or in combination, we observed no effects on either number  
37 or size of organoids (Figure S4B-E showing the highest concentration that has been tested).  
38 These data suggest that other components in nylon leachate are causing the inhibitory  
39 effects on organoid growth. Recent work by Sait and Sørensen and colleagues showed that  
40 the most abundant chemicals leaching from nylon are bisphenol A and benzophenone-3  
41 (45, 46). However, we could not detect these in our leachate, suggesting that if they are  
42 present, they are so in minute quantities. Initial experiments incubating organoids with  
43 different concentrations of bisphenol A or benzophenone-3 did not show effects on  
44 organoid growth of either of them suggesting they are indeed not the culprits in our  
45 leachate (data not shown).

#### 46 47 **Leaching nylon components mainly affected developing organoids**

48 As our experimental set-up specifically studied effects of microplastic fibers on developing  
49 organoids, we next studied whether already-developed, mature organoids were also  
50 affected by nylon microplastics. We therefore exposed organoids to nylon reference  
51 microfibers during organoid formation as before (14-day incubation) and we additionally  
52 exposed fully developed 14-day organoids to microfibers on top of the Matrigel or to nylon  
53 leachate for an additional 7 days. Interestingly, in contrast to the strong effects observed  
54 on developing organoids, we found that the compounds leaching from nylon had no  
55 effects on already-developed organoids (Figure 7A), as reflected by unchanged numbers of  
56 organoids (Figure 7B and C) and unchanged sizes (Figure 7D and E). This suggests that  
57 these nylon leachates are mostly harmful to differentiation of epithelial progenitors, but  
58 do not kill fully differentiated epithelial cells.

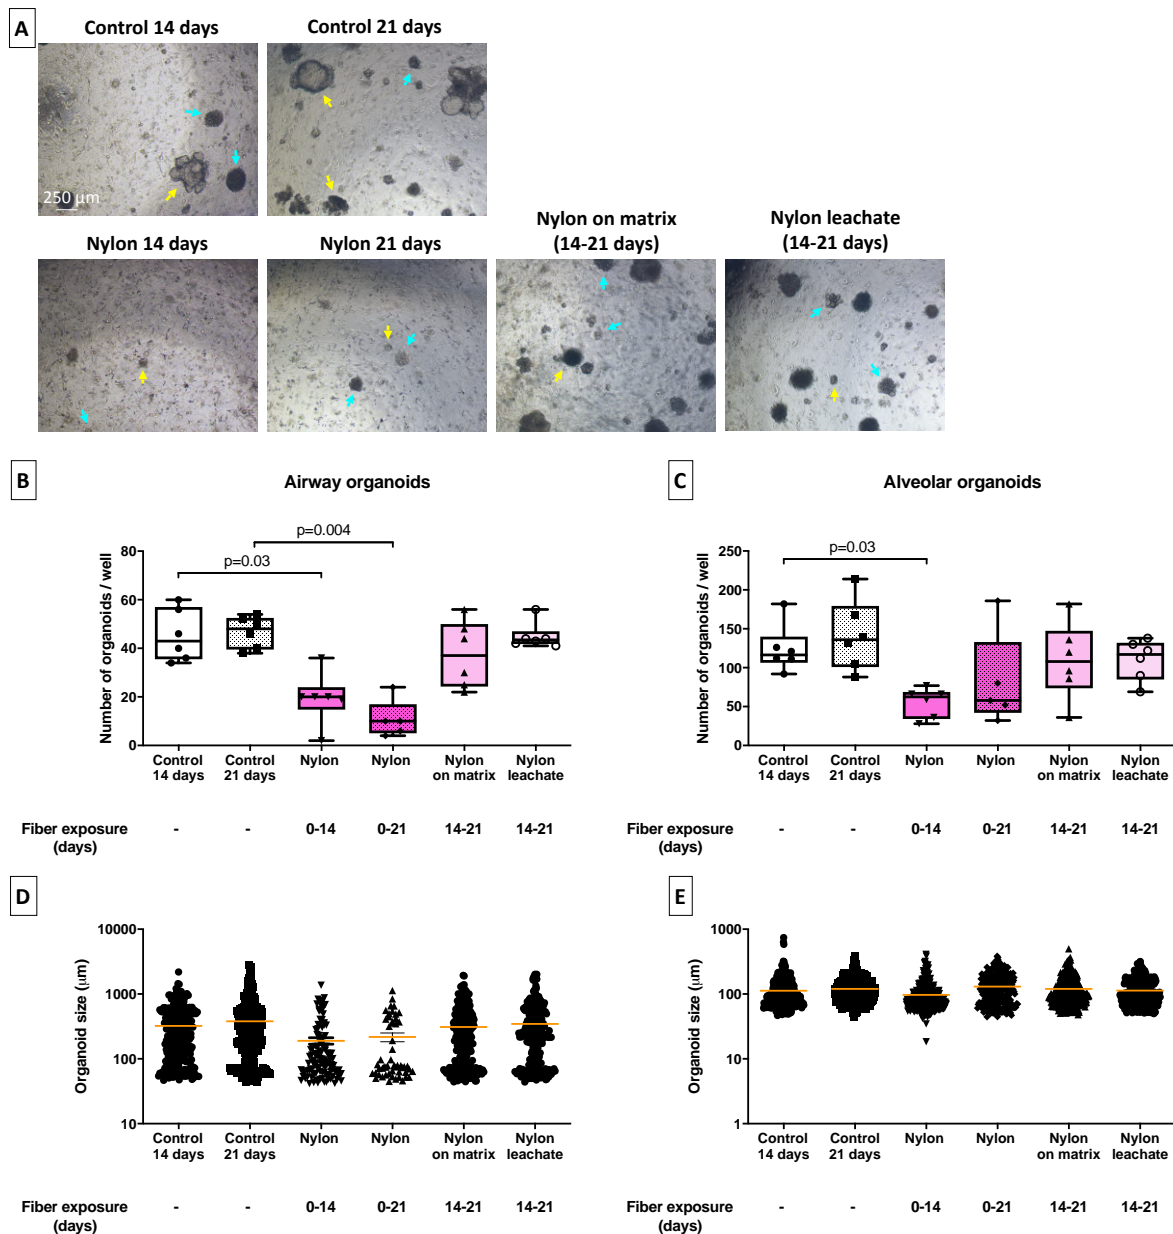

**Figure 7. Effects of nylon reference fiber leachate on already-developed lung organoids.**

(A) Representative light microscopy images of all treatment conditions. Yellow arrows in the light microscopy images indicate airway organoids, whereas cyan arrows indicate alveolar organoids. (B and C) Quantification of the numbers and (D and E) sizes of airway and alveolar organoids following exposure to no or 5000 nylon microfibers (equivalent to 39 μg/ml nylon) for 14 or 21 days. A set of other organoids developed without treatment for 14 days and were exposed to nylon by adding 5000 microfibers (equivalent to 39 μg/ml nylon) on top of the Matrigel or by adding nylon leachate to the culture medium for another 7 days (n=6 independent isolations). Groups were compared using a Kruskal-Wallis test with Dunn's correction for multiple testing. P<0.05 was considered significant.



## 70 **Exposure to nylon inhibited epithelial development pathways and stimulated expression** 71 **of ribosome components**

72 To better understand the mechanisms behind the observed effects on the growth of  
73 airway organoids, we performed bulk RNA-sequencing (RNAseq) analysis on epithelial cells  
74 and fibroblasts resorted from organoid cultures exposed to two different concentrations of  
75 nylon fibers (2000 or 5000 fibers) or not. The condition of 2000 fibers was added because  
76 the effect of 5000 fibers on airway epithelial development was already profound and we  
77 wanted to investigate more subtle changes. However, both conditions had an enormous  
78 impact on epithelial gene expression as depicted by the volcano plots (Figure 8A-D).

79 Exposure to 2000 nylon fibers (equivalent to 16  $\mu\text{g/ml}$  nylon) resulted in 16455 transcripts  
80 being differentially expressed at least two-fold compared to nonexposed controls, with an  
81 q value  $<0.05$  (p value corrected for the false discovery rate), with most being  
82 downregulated (Figure 8A and C). Exposure to 5000 nylon fibers (equivalent to 39  $\mu\text{g/ml}$   
83 nylon) resulted in 39395 transcripts being differentially expressed at least two-fold  
84 compared to nonexposed controls, with most being upregulated (Figure 8B and D).

85 To reduce the number of transcripts, we then selected only those transcripts that had an  
86 average basemean expression of at least 10 and were significantly (q value  $<0.05$ ) up or  
87 downregulated in both exposure conditions of 2000 and 5000 nylon fibers compared to  
88 nonexposed controls. This resulted in 10764 transcripts that were differentially expressed  
89 compared to nonexposed controls, with 5522 being downregulated and 5242 being  
90 upregulated. The downregulated transcripts were then sorted on the lowest q value for  
91 exposure to 2000 fibers and the upregulated transcripts were sorted on the lowest q value  
92 for exposure to 5000 fibers and the top 500 genes of each were used for pathway analysis  
93 using Metascape (47).

94 The top pathways identified for downregulated genes following nylon exposure were  
95 highly enriched for epithelial development and function (figure 8E-F), while the top  
96 pathways identified for upregulated genes were highly enriched for mRNA translation and  
97 protein synthesis (figure 8G-H).



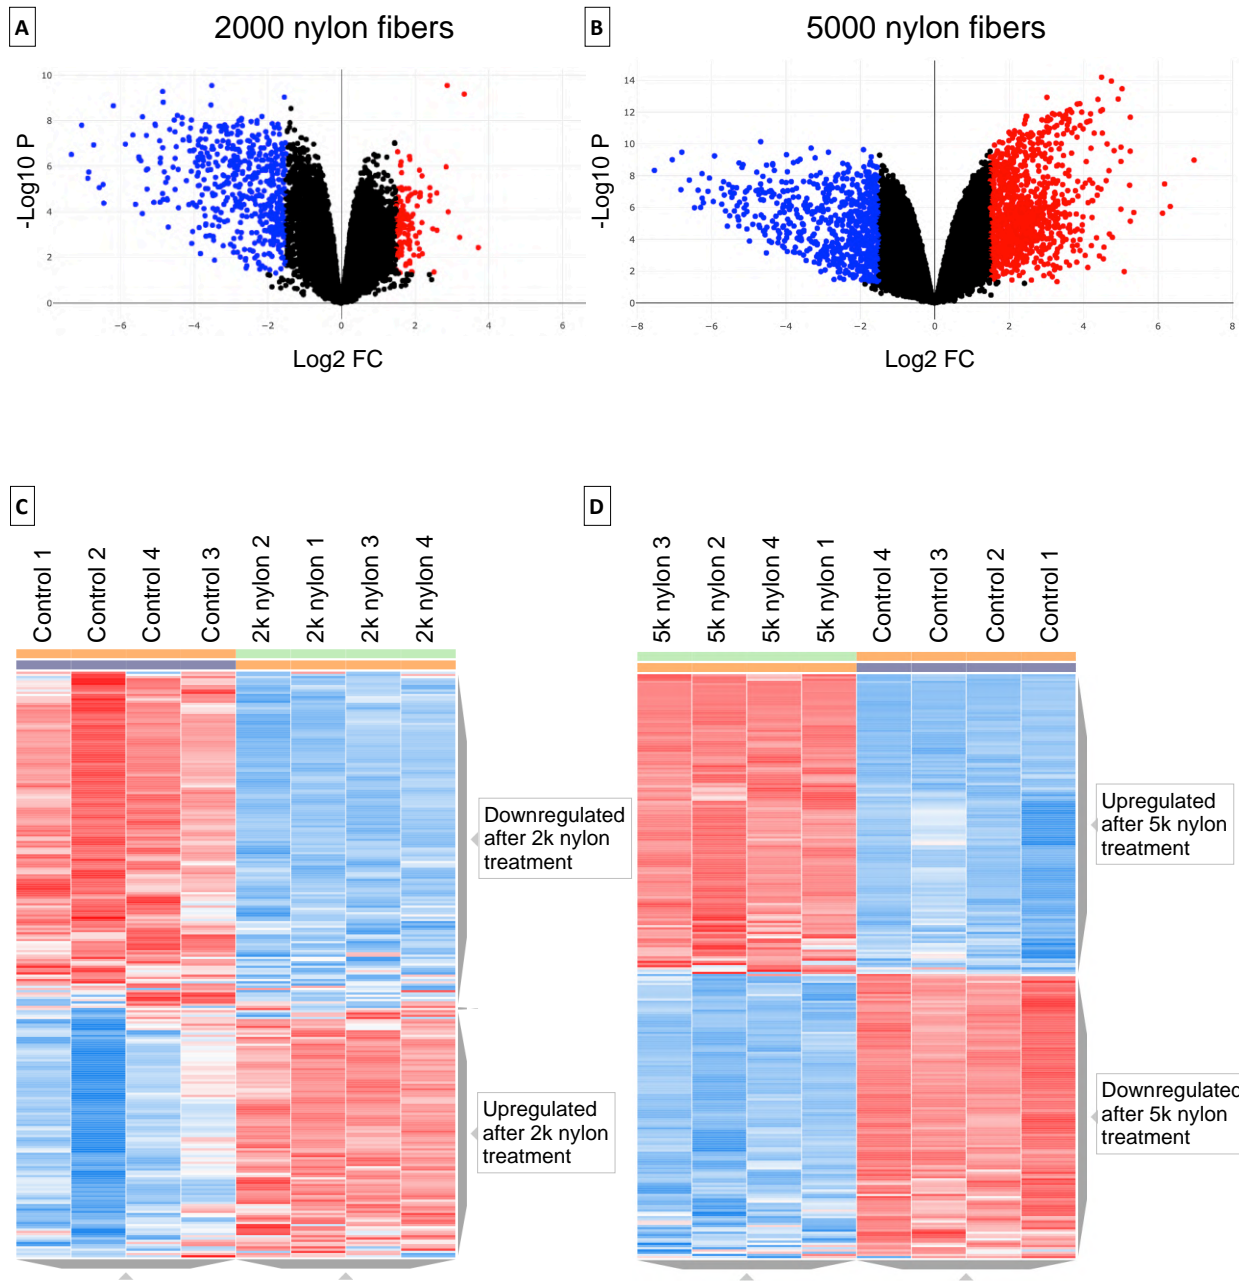

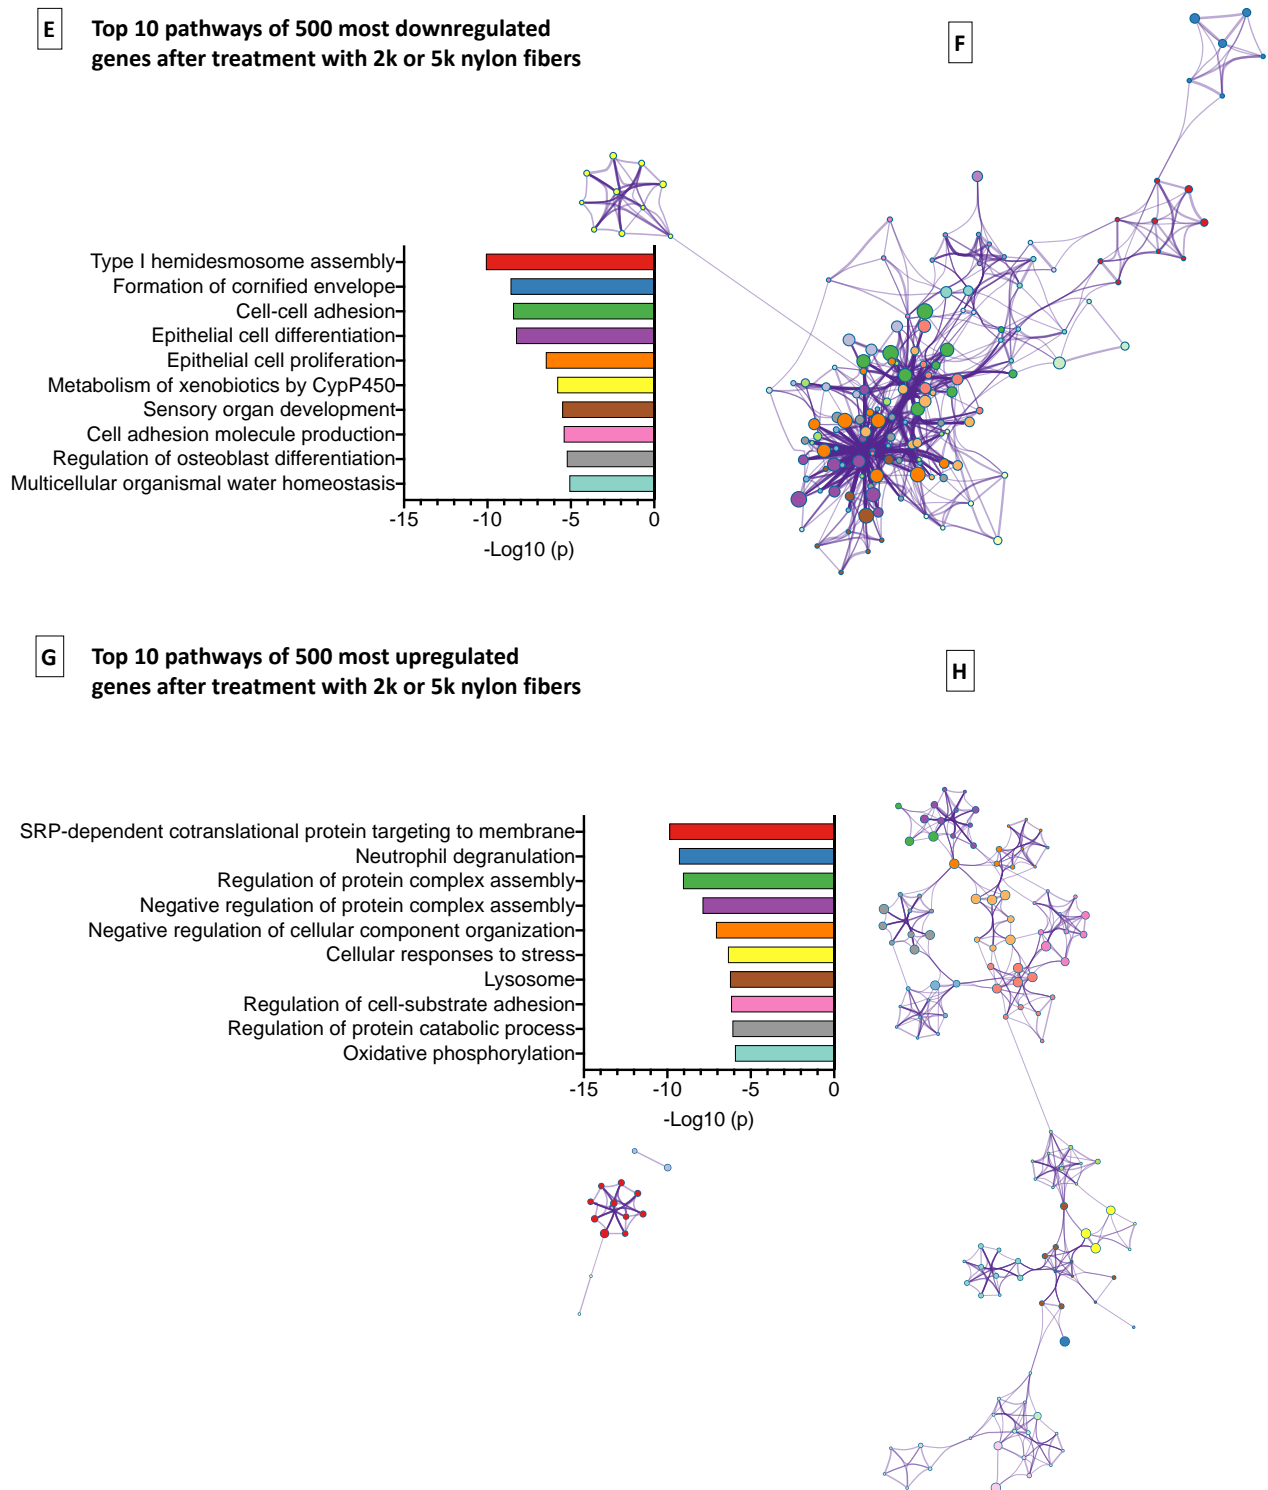

01  
02 **Figure 8: RNAseq analysis of epithelial cells exposed to nylon or not. (A)** Volcano plot of  
03 differentially expressed genes by epithelial cells exposed to 2000 nylon fibers (equivalent to  
04 16  $\mu\text{g/ml}$  nylon) or not. **(B)** Volcano plot of differentially expressed genes by epithelial cells  
05 exposed to 5000 nylon fibers (equivalent to 39  $\mu\text{g/ml}$  nylon) or not. Upregulated genes are  
06 marked in red, downregulated genes in blue. Genes were selected with thresholds of fold  
07 change  $>2$  and  $q < 0.05$ . **(C)** Unsupervised clustering heat map of epithelial cells exposed to

08 *2000 nylon fibers (equivalent to 16 µg/ml nylon) or not. (D) Unsupervised clustering heat*  
09 *map of epithelial cells exposed to 5000 nylon fibers (equivalent to 39 µg/ml nylon) or not.*  
10 *(E) Metascape bar graphs of top 10 nonredundant enrichment clusters of genes*  
11 *downregulated by exposure to nylon ordered based on statistical significance (p value). (F)*  
12 *Metascape enrichment network visualization showing the intra-cluster and inter-cluster*  
13 *similarities of enriched terms of genes downregulated by exposure to nylon, up to ten*  
14 *terms per cluster. Cluster annotations colors are shown in bar graph of panel E. (G)*  
15 *Metascape bar graphs of top 10 nonredundant enrichment clusters of genes upregulated*  
16 *by exposure to nylon ordered based on statistical significance (p value). (H) Metascape*  
17 *enrichment network visualization showing the intra-cluster and inter-cluster similarities of*  
18 *enriched terms of genes upregulated by exposure to nylon, up to ten terms per cluster.*  
19 *Cluster annotations colors are shown in bar graph of panel E. 2k: 2000 fibers; 5k: 5000*  
20 *fibers.*

21  
22 We then investigated expression of individual genes in the top 5 enriched pathways for up  
23 and downregulated genes in more detail (Figures 8E-H). The top 5 enriched pathways for  
24 downregulated genes were type I hemidesmosome assembly, formation of cornified  
25 envelope, cell-cell adhesion, epithelial cell differentiation, and epithelial cell proliferation,  
26 while the top 5 pathways for upregulated genes were SRP-dependent cotranslational  
27 protein targeting to membrane, neutrophil degranulation, regulation of protein complex  
28 assembly, negative regulation of protein complex assembly, and negative regulation of  
29 cellular component organization.

30 We first investigated the downregulated genes and many of them represent important  
31 epithelial populations in the lung. We therefore investigated genes associated with specific  
32 epithelial populations (listed in table 1). The expression of these genes correlated well with  
33 our organoid findings that airway epithelial cell growth was most affected by exposure to  
34 nylon fibers, while alveolar epithelial cell growth was less affected (Figure 9). Both AECI  
35 and AEC II genes (Figure 9A) were only marginally lower expressed after exposure to nylon  
36 while most genes for basal cells (Figure 9B), ciliated cells (Figure 9C), club cells and goblet  
37 cells (Figure 9D) were expressed at significantly lower levels compared to controls with  
38 two noticeable exceptions: ciliated cell marker *Tuba1a* and club cell marker *Scgb1a1*, that

39 were expressed at significantly higher levels compared to nonexposed controls.  
 40 Proliferation markers like proliferation marker protein 67 (*Mki67*), forkhead box protein  
 41 M1 (*Foxm1*), and polo-like kinase 1 (*Plk1*, Figure 9E) confirmed this general lack of  
 42 proliferation in epithelial cells as all three were expressed at lower levels in a dose-  
 43 dependent manner after exposure to nylon fibers. Expression of genes for signaling  
 44 molecules essential for epithelial growth and development were impressively and dose-  
 45 dependently downregulated by nylon exposure as well (Figure 9F), including *Notch1* and  
 46 *Notch2* and their ligands Jagged 1 (*Jag1*) and 2 (*Jag2*) (48-50), *Bmp4* and *Bmp7* (51-53),  
 47 *Wnt4* and *Wnt7a* (54, 55), and the receptor for hepatocyte growth factor, *Met*. The lower  
 48 expression of basal cell-specific markers and essential factors that are needed for  
 49 differentiation of other cell types like ciliated and goblet cells may explain why the growth  
 50 of in particular airway organoids was inhibited most by nylon.

51  
 52 **Table 1:** Markers associated with different epithelial populations in lung tissue.

| Cell type                                  | Protein name                                         | Gene name      |
|--------------------------------------------|------------------------------------------------------|----------------|
| <b>Epithelial cells present in airways</b> |                                                      |                |
| Basal cells                                | Transformation-related protein 63                    | <i>Trp63</i>   |
|                                            | Keratin 5                                            | <i>Krt5</i>    |
|                                            | Integrin alpha-6                                     | <i>Itga6</i>   |
|                                            | Nerve growth factor receptor                         | <i>Ngfr</i>    |
| Ciliated epithelial cells                  | Forkhead box J1                                      | <i>Foxj1</i>   |
|                                            | Serine/threonine kinase 11                           | <i>Stk11</i>   |
|                                            | Acetylated alpha tubulin                             | <i>Tuba1a</i>  |
| Goblet cells                               | Mucin 5 subtype B                                    | <i>Muc5b</i>   |
|                                            | Mucin subtype AC                                     | <i>Muc5ac</i>  |
| Club cells                                 | Secretoglobin family 1A member 1                     | <i>Scgb1a1</i> |
|                                            | BPI fold containing family A member 1                | <i>Bpifa1</i>  |
| <b>Epithelial cells present in alveoli</b> |                                                      |                |
| Alveolar epithelial cells type I (AECI)    | Homeodomain-only protein homeobox                    | <i>Hopx</i>    |
|                                            | Advanced glycosylation end-product specific receptor | <i>Ager</i>    |
| Alveolar epithelial cells type II (AECII)  | Surfactant protein C                                 | <i>Sftpc</i>   |
|                                            | Surfactant protein B                                 | <i>Sftpb</i>   |

53  
 54 To exclude the possibility that these effects on epithelial cells were the result of a  
 55 decreased support function from fibroblasts, for instance by nylon selectively killing  
 56 fibroblasts or inhibiting the expression of important growth factors, we separately

57 analyzed the resorted fibroblast fraction for expression of proliferation genes and  
58 important growth factors, i.e. *Mki67*, *Foxm1*, *Plk1*, fibroblast growth factors 2, 7, and 10  
59 (*Fgf2*, *Fgf7*, and *Fgf10*), *Wnt2*, *Wnt5a*, and hepatocyte growth factor (*Hgf*) (33). None of  
60 these genes were negatively affected in fibroblasts after exposure to nylon fibers  
61 compared to untreated controls and expression of most actually went up slightly (Figure  
62 S5).

63 The genes most prominently upregulated after exposure to nylon fibers were mostly  
64 encoding for ribosomal proteins, with ribosomal protein L28 (*Rpl28*), L31 (*Rpl31*), and L38  
65 (*Rpl38*) being most profoundly upregulated (Figure 9G). Ribosomal proteins are a large  
66 family of proteins and essential parts of ribosomes translating mRNA to protein. Recent  
67 data has shown that heterogeneity in ribosomal protein composition within ribosomes  
68 makes them selective for translating subpools of transcripts (56). For instance, Rpl38 has  
69 been shown to regulate translation of the homeobox (*Hox*) genes, that are key in  
70 anatomical development (57). We therefore also investigated the expression of all *Hox*  
71 genes and some specific members of this family involved in lung epithelial development in  
72 more detail (Figure 9H) (58, 59). After exposure to nylon fibers, expression of *Hox* family  
73 members was significantly higher and this pattern was seen for highlighted members  
74 *Hoxa4*, *Hoxa5*, *Hoxc9*, and *Hoxb3* as well.

57  
58  
59  
60  
61  
62  
63  
64  
65  
66  
67  
68  
69  
70  
71  
72  
73  
74  
75

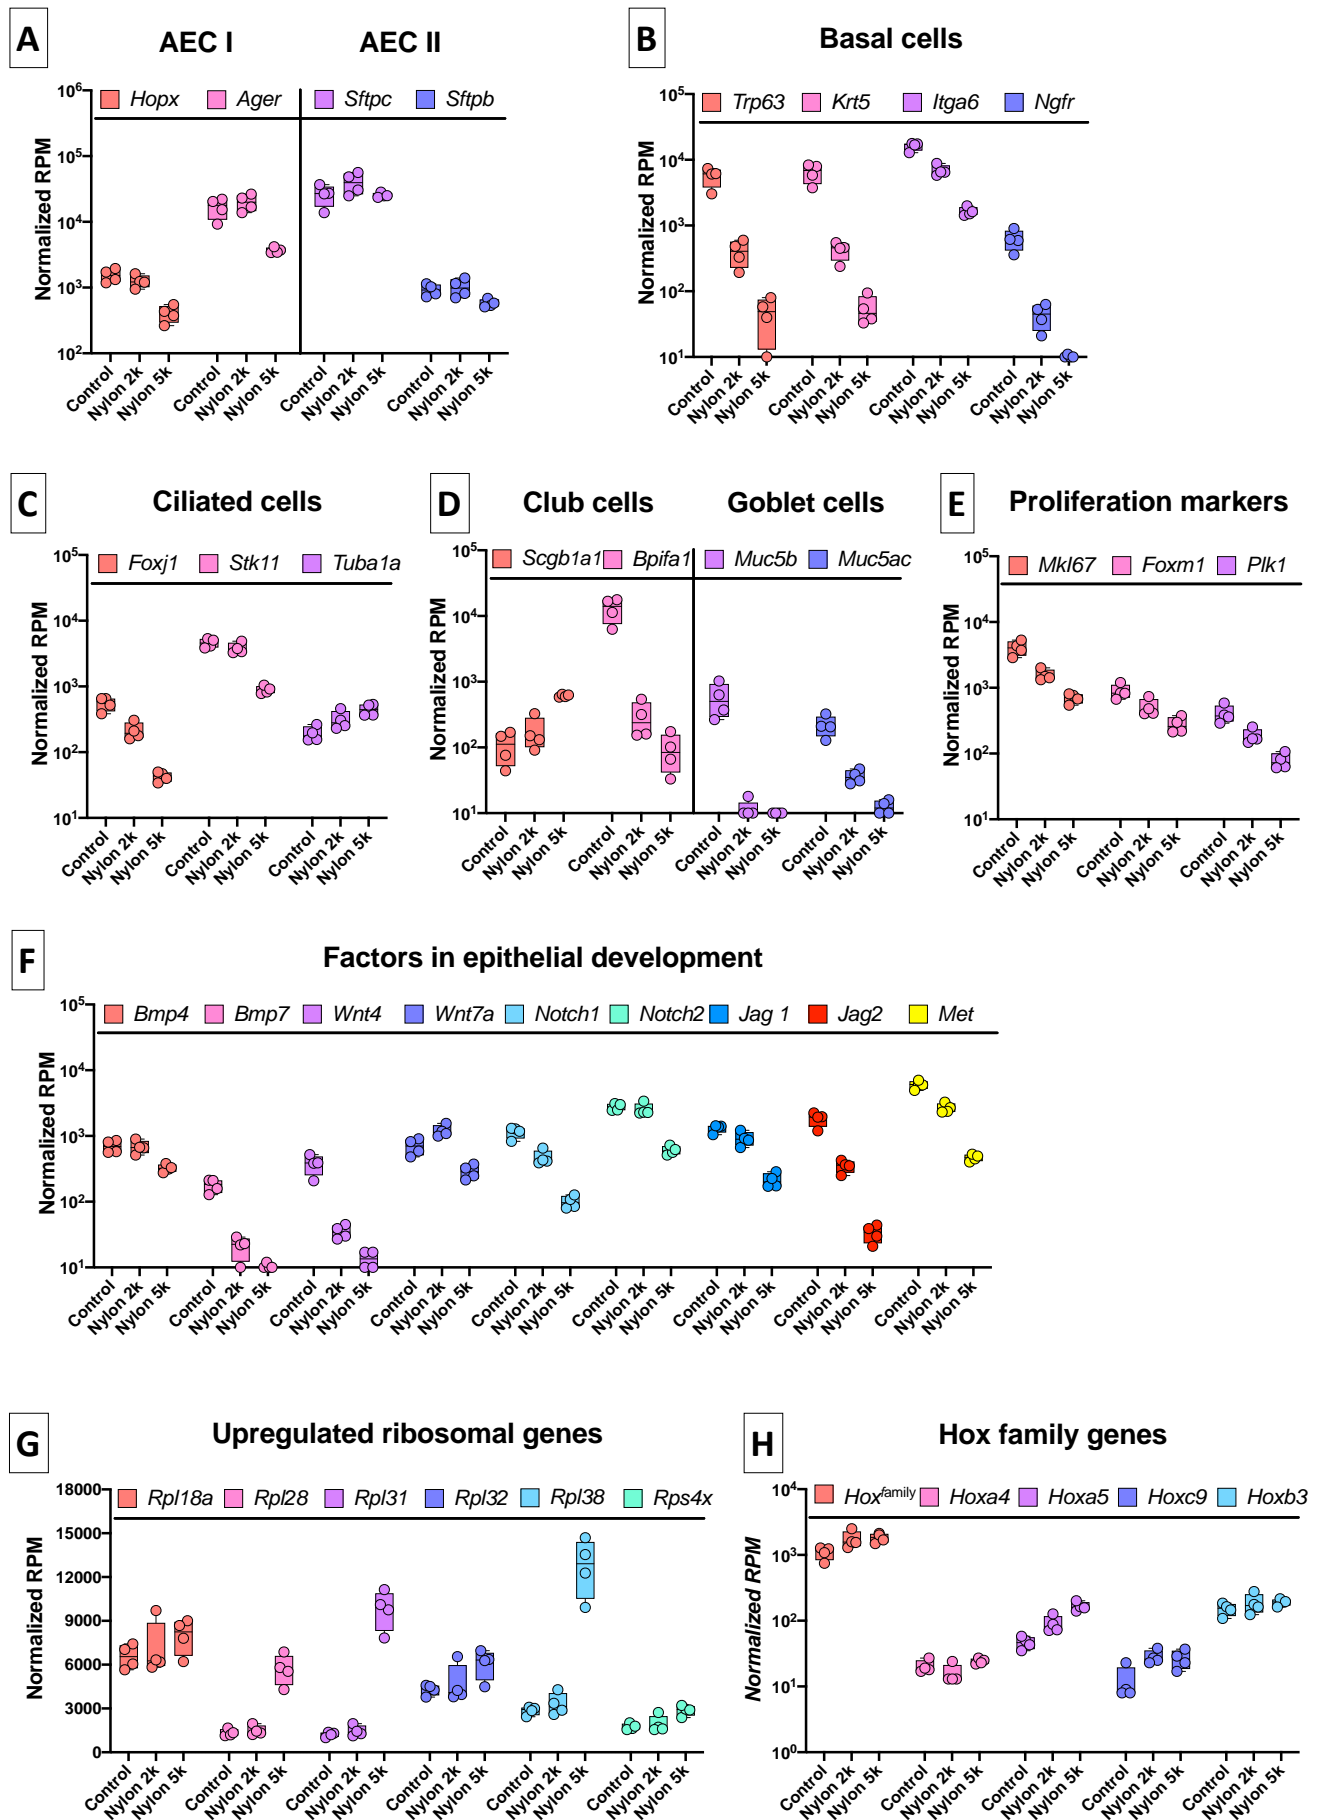

77 **Figure 9: Expression profiles of individual genes from the pathway analyses.** Genes shown  
78 were significantly differentially expressed in epithelial cells isolated from organoids  
79 exposed to 2000 (2k) or 5000 (5k) nylon fibers compared to untreated controls according to  
80 a false discovery rate of  $q < 0.05$  ( $n=4$  independent isolations). The following genes in the  
81 following conditions were not significantly different: 2k nylon: *Hopx*, *Ager*, *Sftpc*, *Sftpb*,  
82 *Stk11*, *Scgb1a1*, *Bmp4*, *Notch2*, *Hoxa4*; 5k nylon: *Hopx*, *Ager*, *Plk1*.  
83 (A) Genes highly expressed by alveolar epithelial cells type I (AECI) and type II (AECII). (B)  
84 Genes highly expressed in basal cells. (C) Genes highly expressed in ciliated cells. (D) Genes  
85 highly expressed in club cells and goblet cells. (E) Genes associated with proliferation. (F)  
86 Genes encoding factors important for epithelial development. (G) Genes encoding  
87 ribosomal proteins. (H) Genes encoding Hox family genes.

## 90 Discussion

91 Recent reports have shown that man-made fibers are ubiquitously present in indoor air (9,  
92 35-38). It is estimated that approximately 30% of those indoor fibers are of plastic origin,  
93 particularly from textiles (9, 35-38). The lungs are continuously exposed to this airborne  
94 microplastic pollution (60), but the consequences of common household exposure on our  
95 lungs are unclear. In our present work, we found that both polyester and nylon microfibers  
96 negatively affected the growth and development of human and murine lung organoids,  
97 with nylon being the most harmful. Already established lung organoids were not affected  
98 and therefore our results may be of particular importance for young children with  
99 developing airways and for people undergoing high levels of epithelial repair, such as  
00 people with respiratory diseases.

01  
02 Nylon was found to be the most consistently harmful for growth of airway organoids and  
03 was less inhibitory for growth of alveolar organoids, while polyester affected both types  
04 equally but less profoundly than nylon. This was the case for our reference fibers as well as  
05 environmentally relevant fibers made from fabrics purchased in a local fabric store. The  
06 gene expression analysis also confirmed that growth of alveolar organoids was affected  
07 less by nylon exposure and even appeared *induced* after treatment with leachate or lower



08 numbers of nylon fibers. The explanation for this finding may be found in the  
09 downregulation of Notch signaling pathway members by nylon fibers. Multiple studies  
10 have shown that Notch signaling is required for development of airway epithelial cells,  
11 most specifically goblet cells, whereas disruption of this signaling boosts alveolar epithelial  
12 development (61, 62). Both *Notch1* and *Notch2*, as well as their ligands *Jag1* and *Jag2*  
13 were expressed at significantly lower levels after nylon treatment, suggesting disruption of  
14 Notch signaling may be responsible for the divergent effect nylon has on airway versus  
15 alveolar epithelial growth.

16 The Notch pathway, incidentally, is also important for the development of club cells (63).  
17 Morimoto and colleagues showed that *Notch2* was involved in the decision between club  
18 cell or ciliated cell development. Interestingly, the gene expression data for club cells and  
19 ciliated cells were somewhat ambiguous, with important markers for these cell types  
20 having higher expression (*Scgb1a1* for club cells and *Tub1a1* for ciliated cells) and others  
21 having lower expression (*Bpifa1* for club cells and *Foxj1* and *Stk11* for ciliated cells) after  
22 nylon exposure. This may suggest that the lower expression of *Notch2* may be hampering  
23 the cell fate decision between club and ciliated cells in some way, resulting in improperly  
24 differentiated cell types. In combination with the inhibited development of basal epithelial  
25 cells and goblet cells, this altered airway epithelial differentiation may explain the  
26 bronchiolitis found in nylon flock workers and rats exposed to nylon (64-66).

27  
28 Our results demonstrated that the negative effect of nylon fibers on development of  
29 particularly airway organoids was caused by components leaching from these fibers. As  
30 the most abundant components in this leachate, the cyclic oligomers, were not  
31 responsible for this effect, we used RNAseq analysis to look for signatures of other  
32 components. Although we could not detect bisphenol A in our leachate, it is of interest to  
33 note that exposure of fruit flies to bisphenol A specifically upregulated ribosome-  
34 associated genes (67), similar to what we found in our study. The association of these *Rpl*  
35 genes with the *Hox* family genes is of particular interest for lung epithelial development.  
36 *Rpl38* was one of the three most upregulated *Rpl* genes by nylon and was shown to  
37 interact with a specific subset of *Hox* genes including *Hoxa4*, *Hoxa5*, and *Hoxb3* (57). These  
38 have all been associated with epithelial differentiation, with *Hoxa5* taking a center stage in

39 goblet versus club cell differentiation (58, 59). Boucherat and colleagues showed that loss  
40 of *Hoxa5* drove epithelial differentiation towards goblet cell differentiation at the expense  
41 of club cell differentiation and *Scgb1a1* expression (58). Remarkably, *Hoxa5* was expressed  
42 at significantly higher levels in our dataset in a dose-dependent manner after exposure to  
43 nylon and we also found a matching dose-dependent increase in *Scgb1a1* and decrease in  
44 *Muc5ac* and *Muc5b* expression. Taken together our data suggest that component (s) in  
45 nylon leachate may be skewing differentiation of epithelial progenitors away from airway  
46 epithelial cells possibly through changes in expression of *Hoxa5* and/or *Notch*. Which  
47 components or combinations of components are responsible for these effects is still an  
48 open question.

49  
50 A strength of using lung organoids is the opportunity to directly translate murine findings  
51 to human lung epithelial repair (32, 33, 43, 68, 69). Using cells isolated from human lungs  
52 we have shown human epithelial cells respond similarly to polyester and nylon fibers,  
53 demonstrating our results are relevant for human epithelial differentiation and growth  
54 too. Despite this advantage, lung organoids are a relatively simple model of lung tissue and  
55 lack the immune and endothelial compartment present *in vivo*. Especially having the  
56 immune compartment present could alter how lung tissue responds to these microplastic  
57 fibers. For example, innate immune cells like macrophages are also one of the first cells to  
58 come into contact with microplastic fibers following inhalation and macrophages are  
59 known to respond strongly to inhaled particles and fibers (70) and are also important for  
60 lung repair (71). It is therefore recommended to include lung macrophages in lung  
61 organoid cultures in future studies as was done before by Choi *et al.* (72). This way, a more  
62 comprehensive view on the interaction between pivotal lung cells and microplastics can be  
63 obtained.

64  
65 The implication of our results for the human population is of high relevance. It is important  
66 to note that similar to the high occupational exposure in industry workers, the microplastic  
67 fiber doses as used in our *in vitro* experiments are much higher than daily exposure for  
68 most people. Previous studies estimated that a male person with light activity may inhale  
69 around 272 microplastic particles per day based on air sampling using a breathing thermal

70 manikin (60). The total surface of airway epithelial cells is 2471 cm<sup>2</sup> for human lungs (73),  
71 resulting in 0.1 particle/cm<sup>2</sup>. Our murine cultures had an average of 70 airway organoids  
72 with an average size of 320 μm, resulting in a total surface of 0.2 cm<sup>2</sup> that was incubated  
73 with 5000 fibers or 25,000 fibers/cm<sup>2</sup>. For our calculations we assumed these  
74 particles/fibers will get trapped onto airway epithelial cells. Generally particles or fibers of  
75 sizes between 10 and 100 μm will deposit onto epithelial cells covering airway walls (40).  
76 Only fibers with a diameter smaller than 3 μm have the ability to penetrate deep into the  
77 lungs and reach the alveoli. Our fiber sizes were limited by the availability of polyester and  
78 nylon filaments of standardized small diameters and therefore were not small enough for  
79 alveolar deposition. However, airway trapping can still cause local harm as we found nylon  
80 fibers to inhibit airway epithelial differentiation most. It will therefore be crucial to study  
81 in more detail how many and what kind of fibers deposit in which regions of the lungs and  
82 what fraction can still be cleared. In addition, we need to gather more information about  
83 exposure levels in indoor environments to assess real-life inhalation levels. A limitation  
84 here is the detection of microplastics, as smaller particles might escape current detection  
85 methods (10, 74). Especially our finding that epithelial differentiation and repair  
86 mechanisms are affected most by microplastics exposure, suggests airborne microplastics  
87 may be most harmful to young children with developing airways and to people undergoing  
88 high levels of epithelial repair. These could be people with a chronic lung disease or even  
89 healthy individuals suffering from a seasonal respiratory virus infection.

90  
91 In conclusion, with the ongoing and growing use of plastics, potential associated health  
92 problems in the human population may also increase. The results of the present study  
93 strongly encourage to look in more detail at both hazard of and exposure to microplastic  
94 fibers, and outcomes of these experiments will be valuable to advise organizations such as  
95 the World Health Organization and Science Advice for Policy by European Academies who  
96 have recently stated that more research is urgently needed (30, 31). Importantly, future  
97 research should focus on examining the presence and number of such fibers both in our  
98 indoor environment and in human lung tissue, to better estimate the actual risk of these  
99 fibers to human health.

## 01 **Materials and Methods**

02

### 03 **Production of microfibers and leachate**

#### 04 *Reference microfibers and leachate*

05 Microfibers of standardized dimensions were produced as described before (34). In short,  
06 polyester and nylon fibers (both Goodfellow, UK) with filament diameters of  $14\pm 3.5\ \mu\text{m}$   
07 and  $10\pm 2.5\ \mu\text{m}$  respectively were aligned by wrapping them around a custom-made spool,  
08 coated with a thin layer of cryo compound (KP-CryoCompound, VWR International B.V.,  
09 PA, USA) and frozen. Aligned fibers were cut into similar length parts ( $\sim 2\ \text{cm}$ ) using a  
10 scalpel (Swann-Morton, UK) and moulded onto a compact block that was oriented  
11 perpendicular to the base of a cryomicrotome (Microm HM 525, Thermo Fisher Scientific,  
12 MA, USA). Microfibers were cut at lengths of  $50\ \mu\text{m}$  for polyester and  $30\ \mu\text{m}$  for nylon,  
13 after which the fibers were thawed, washed with water through a  $120\ \mu\text{m}$  filter (Merck  
14 Millipore, MA, USA) to remove miscut fibers and contaminants, collected by vacuum  
15 filtration using  $8\ \mu\text{m}$  polycarbonate membrane filters (Sterlitech, WA, USA) and stored dry  
16 at  $-20^\circ\text{C}$ .

17 Nylon leachate was produced by incubation of nylon reference microfibers in phosphate  
18 buffered saline (PBS) for 7 days at  $37^\circ\text{C}$  in the dark, followed by filtration using a  $0.2\ \mu\text{m}$   
19 syringe filter (GE Healthcare Life Sciences, UK). The leachate was stored at  $-20^\circ\text{C}$  until  
20 further use.

#### 21 *Environmental microfibers*

22 Environmental polyester and nylon textile microfibers were prepared from commercially  
23 available pure fabrics. White polyester fabric was washed at  $40^\circ\text{C}$  in a washing machine  
24 (Samsung, South Korea) and dried in a tumble dryer (Whirlpool, MI, US). Fibers with an  
25 estimated filament diameter of  $15\ \mu\text{m}$  were collected on the filter of the tumble dryer and  
26 subsequently frozen with cryo compound and sectioned into lengths of  $50\ \mu\text{m}$  using a  
27 cryomicrotome. White nylon fabric (estimated filament diameter of  $40\ \mu\text{m}$ ) was cut into  
28 small squares, stacked, frozen with cryo compound, and cut into lengths of  $12\ \mu\text{m}$ . All  
29 microfibers were thawed, washed with water through a  $120\ \mu\text{m}$  filter, collected by vacuum  
30 filtration ( $8\ \mu\text{m}$  filter) and finally stored at  $-20^\circ\text{C}$ .

31  
32  
33  
34  
35  
36  
37  
38  
39  
40  
41  
42  
43  
44  
45  
46  
47  
48  
49  
50  
51  
52  
53  
54  
55  
56  
57  
58  
59

## **Characterization of microfibers and leachate**

### *Scanning electron microscopy*

Samples were prepared for scanning electron microscopy (SEM) analysis on an aluminium sample holder using adhesive carbon-coated tape. Excessive microfibers were removed using pressurized air, after which the samples were sputter-coated with 10 nm of gold. Images were obtained using a JSM-6460 microscope (Jeol, Japan) at an acceleration voltage of 10 kV.

### *Dimensions*

Digital photomicrographs were captured at 200× magnification using a Nikon Eclipse TS100 inverted microscope coupled to a Nikon Digital Sight DS-U3 microscope camera controller (both Japan), after which microfiber diameters and lengths (median of 200) were determined using NIS-Elements AR 4.00.03 software.

## **Ethics**

### *Animal experiments*

The experimental protocol for the use of mice for epithelial cell isolations was approved by the Animal Ethical Committee of the University of Groningen (The Netherlands) and all experiments were performed according to strict governmental and international guidelines on animal experimentation. C57BL/6 mice (8-14 weeks) were bred at the Central Animal Facility of the University Medical Center Groningen (UMCG) (IVD 15303-01-004). Animals received ad libitum normal diet with a 12 h light/dark cycle.

### *Human lung tissue*

Histologically normal lung tissue was anonymously donated by individuals with COPD (n=6) or without COPD (n=1) undergoing surgery for lung cancer and not objecting to the use of their tissue. COPD patients included ex- and current- smoking individuals with GOLD stage I-IV disease (GOLD I=1, GOLD II=2, GOLD IV=3). Subjects with other lung diseases such as asthma, cystic fibrosis, or interstitial lung diseases were excluded. The study protocol was consistent with the Research Code of the University Medical Center Groningen (UMCG)

50 and Dutch national ethical and professional guidelines ([www.federa.org](http://www.federa.org)). Sections of lung  
51 tissue of each patient were stained with a standard haematoxylin and eosin staining and  
52 checked for abnormalities by a lung pathologist.

### 53 **Cell cultures**

54 Mouse lung fibroblasts (CCL-206, ATCC, Wesel, Germany) or human lung fibroblasts  
55 (MRC5, ATCC, CCL-171) were cultured in 1:1 DMEM (Gibco, MD, USA) and Ham's F12  
56 (Lonza, Switzerland) or Ham's F12 respectively, both supplemented with 10% heat  
57 inactivated fetal bovine serum (FBS, GE Healthcare Life Sciences), 100 U/ml penicillin and  
58 100 µg/ml streptomycin, 2 mM L-glutamine and 2.5 µg/ml amphotericin B (all Gibco).  
59 Fibroblasts were cultured at 37°C under 5% CO<sub>2</sub> and humidified conditions. For use in  
60 organoid cultures, near-confluent cells were proliferation-inactivated by incubation with  
61 10 µg/ml mitomycin C (Sigma-Aldrich, MO, USA) in cell culture medium for 2 hours, after  
62 which they were washed in PBS, and left in normal medium for at least 1 hour before  
63 trypsinizing and counting.

### 74 **Lung epithelial cell isolation**

#### 75 *Mouse lung epithelial cell isolation*

76 Epithelial cells were isolated from lungs of mice using antibody-coupled magnetic beads  
77 (microbeads) as described before (32, 33, 68). In short, mice were sacrificed under  
78 anaesthesia, after which the lungs were flushed with 0.9% NaCl and instilled with 75  
79 caseinolytic units/1.5 ml dispase (Corning, NY, USA). After 45 minutes of incubation at  
80 room temperature, the lobes (excluding trachea and extrapulmonary airways) were  
81 homogenized in DMEM containing 100 U/ml penicillin and 100 µg/ml streptomycin and 40  
82 µg/ml DNase1 (PanReac AppliChem, Germany), washed in DMEM (containing penicillin,  
83 streptomycin and DNase1), and the digested tissue was passed through a 100 µm cell  
84 strainer. The suspension was incubated for 20 minutes at 4°C with anti-CD31 and anti-  
85 CD45 microbeads in MACS buffer and magnetically sorted using LS columns. The  
86 CD31-/CD45- flow-through was incubated for 20 minutes at 4°C with anti-CD326 (EpcAM)  
87 microbeads in MACS buffer, after which purified epithelial lung cells were obtained by  
88 positive selection using LS columns. CD326-positive epithelial cells were resuspended in  
89

90 CCL206 fibroblast medium, counted and seeded into Matrigel immediately after isolation  
91 with equal numbers of CCL206 fibroblasts, as described below. All materials were  
92 purchased at Miltenyi Biotec (Germany) unless stated otherwise.

### 93 *Human lung epithelial cell isolation*

94  
95 Human lung epithelial cells were isolated from lung tissue specimens obtained from  
96 patients. Peripheral lung tissue was minced and dissociated in DMEM-containing enzymes  
97 (Multi Tissue Dissociation Kit) at 37°C using a gentleMACS Octo Dissociator. The cell  
98 suspension was filtered (70 µm and 35 µm nylon strainer, respectively) prior to 20-minute  
99 incubation at 4°C with anti-CD31 and anti-CD45 microbeads in MACS buffer. The  
00 CD31–/CD45– fraction was obtained by negative selection using an AutoMACS. Epithelial  
01 cells were then isolated by positive selection after 20-minute incubation at 4°C with anti-  
02 CD326 (EpCAM) microbeads in MACS buffer. Human EpCAM+ cells were resuspended in  
03 1:1 DMEM and Ham’s F12, supplemented with 10% heat inactivated FBS, 100 U/ml  
04 penicillin and 100 µg/ml streptomycin, 2 mM L-glutamine and 2.5 µg/ml amphotericin B,  
05 counted and seeded into Matrigel immediately after isolation with equal numbers of  
06 MRC5 fibroblasts. All materials were purchased at Miltenyi Biotec unless stated otherwise.

### 07 08 **Lung organoid cultures**

09 Lung organoids were grown as previously described with minor modifications (32, 33, 68).  
10 For mouse lung organoids, 10,000 EpCAM+ cells and 10,000 CCL206 fibroblasts were  
11 seeded, and for human lung organoids, 5,000 EpCAM+ cells and 5,000 MRC5 fibroblasts  
12 were seeded in 100 µl growth factor-reduced Matrigel matrix (Corning) diluted 1:1 in  
13 DMEM:Ham’s F-12 1:1 containing 10% FBS, 100 U/ml penicillin and 100 µg/ml  
14 streptomycin, 2 mM L-glutamine and 2.5 µg/ml amphotericin B into transwell 24-well cell  
15 culture plate inserts (Corning). Organoids were cultured in DMEM:Ham’s F-12 1:1  
16 supplemented with 5% FBS, 100 U/ml penicillin and 100 µg/ml streptomycin, 2 mM L-  
17 glutamine, 2.5 µg/ml amphotericin B, 4 ml/l insulin-transferrin-selenium (Gibco), 25 µg/l  
18 recombinant mouse (Sigma-Aldrich) or human epithelial growth factor (EGF, Gibco) and  
19 300 µg/l bovine pituitary extract (Sigma-Aldrich). During the first 48h of culture, 10 µM Y-  
20 27632 (Axon Medchem, the Netherlands) was added to the medium.



21 A titration curve for polyester or nylon microfibers was made with 2000, 3000, 4000 or  
22 5000 fibers per well corresponding to approximately 49, 73, 98 and 122  $\mu\text{g}/\text{ml}$  of polyester  
23 fibers or 16, 23, 31, and 39  $\mu\text{g}/\text{ml}$  of nylon fibers. For all other experiments, 5000 polyester  
24 or nylon reference (equivalent to 122  $\mu\text{g}/\text{ml}$  of polyester or 39  $\mu\text{g}/\text{ml}$  of nylon) or  
25 environmental microfibers (equivalent to 122  $\mu\text{g}/\text{ml}$  of polyester or 39  $\mu\text{g}/\text{ml}$  of nylon and)  
26 were used per condition. Fibers were in direct contact with developing organoids during  
27 14 days by mixing them with Matrigel and cells prior to seeding in the insert, except for  
28 those experiments studying effects of leaching nylon components. In those cases, 5000  
29 polyester and nylon reference fibers were added on top of the organoids, thereby  
30 excluding physical contact between the microfibers and the developing organoids, or  
31 equivalent amounts of fiber leachate were added to the medium during 14 days of  
32 organoid culture. For testing the effects of nylon oligomers, concentrations between 26.8  
33  $\text{ng}/\text{ml}$  and 53.6  $\mu\text{g}/\text{ml}$  were used; the latter concentration being twice as high as the used  
34 fiber concentrations (5000 fibers per condition). Oligomers were synthesized and  
35 characterized as described in the supplementary materials and methods. All organoid  
36 cultures were maintained for 14 to 21 days at 37 °C under 5%  $\text{CO}_2$  and humidified  
37 conditions. Medium was refreshed 3 times per week.

38 Organoid colony forming efficiency was quantified by manually counting the total number  
39 of organoids per well after 14 or 21 days of culturing using a light microscope at 100 $\times$   
40 magnification. For mouse organoids, a distinction was made between airway and alveolar  
41 organoids, whereas for human organoids only one organoid phenotype was distinguished.  
42 The diameter of the organoids was measured using a light microscope (Nikon, Eclipse Ti),  
43 only including organoids larger than 50  $\mu\text{m}$  in diameter, with a maximum of 50 organoids  
44 per phenotype per well.

### 46 **Immunofluorescence staining**

47 Organoid cultures in Matrigel were washed with PBS, fixed in ice-cold 1:1 acetone and  
48 methanol (both Biosolve Chimie, France) for 15 minutes at -20°C and washed again with  
49 PBS after which aspecific antibody-binding was blocked for 2 hours in 5% bovine serum  
50 albumin (BSA, Sigma-Aldrich). Organoids were incubated overnight at 4°C with the primary  
51 antibodies (mouse anti-acetylated  $\alpha$ -tubulin (Santa Cruz, TX, USA) and rabbit anti-

52 prosurfactant protein C (Merck, Germany)) both diluted 1:200 in 0.1% BSA and 0.1% Triton  
53 (Sigma-Aldrich) in PBS. Next, after extensive but gentle washing with PBS, organoids were  
54 incubated with the appropriate Alexa-conjugated secondary antibody for 2 hours at room  
55 temperature (Alexa Fluor 488 donkey anti rabbit IgG and Alexa Fluor 568 donkey anti  
56 mouse IgG, both Thermo Fisher Scientific) diluted 1:200 in 0.1% BSA and 0.1% Triton in  
57 PBS. Organoid cultures were washed with PBS, excised using a scalpel, mounted on glass  
58 slides (Knittel, Germany) using mounting medium containing DAPI (Sigma-Aldrich) and  
59 covered with a cover glass (VWR). Digital photomicrographs were captured at 200×  
60 magnification using a DM4000b fluorescence microscope and LAS V4.3 software (both  
61 Leica, Germany).

### 62

### 63 **Isolation of epithelial cells and fibroblasts from organoid cultures**

64 200,000 mouse EpCAM+ primary cells and 200,000 CCL206 fibroblasts (n=4 independent  
65 isolations) were seeded in 1 ml Matrigel diluted 1:1 in DMEM containing 10% FBS in 6-well  
66 plates (Greiner Bio-One, The Netherlands). 12.000 or 30.000 nylon reference microfibers  
67 were mixed with Matrigel and cells prior to seeding. Murine organoid culture medium was  
68 maintained on top and refreshed every two days. After 7 days, organoid cultures were  
69 digested with 50 caseinolytic units/ml dispase for 30 minutes at 37°C, transferred to 15 ml  
70 tubes, washed with MACS BSA stock solution and autoMACS rinsing solution (both  
71 Miltenyi), and digested further with trypsin (VWR) diluted 1:5 in PBS for 5 minutes at 37°C.  
72 The cell suspension was then incubated for 20 minutes at 4°C with anti-EpCAM microbeads  
73 in MACS buffer, after which the suspension was passed through LS columns. Both the  
74 EpCAM+ (epithelial cells) and EpCAM- (fibroblasts) cell fractions were used for RNA  
75 isolation and subsequent sequencing.

### 76

### 77 **Library preparation and RNA sequencing**

78 Total RNA was isolated from EpCAM+ and EPCAM- cell fractions using a Maxwell®  
79 LEV simply RNA Cells/Tissue kit (Promega, WI, USA) according to manufacturer's  
80 instructions. RNA concentrations were determined using a NanoDrop One  
81 spectrophotometer (Thermo Fisher Scientific). Total RNA (300 ng) was used for library

82 preparation. Paired-end sequencing was performed using a NextSeq 500 machine  
83 (Illumina; mate 1 up to 74 cycles and mate 2 up to 9 cycles). Mate 1 contained the first STL  
84 (stochastic labeling) barcode, followed by the first bases of the sequenced fragments, and  
85 mate 2 only contained the second STL barcode. The generated data were subsequently  
86 demultiplexed using sample-specific barcodes and changed into fastq files using bcl2fastq  
87 (Illumina; version 1.8.4). The quality of the data was assessed using FastQC (75). The STL  
88 barcodes of the first mate were separated from the sequenced fragments using an in-  
89 house Perl script. Low quality bases and parts of adapter sequences were removed with  
90 Cutadapt (version 1.12; settings: q=15, O=5, e=0.1, m=36) (76). Sequenced poly A tails  
91 were removed as well, by using a poly T sequence as adapter sequence (T (100); reverse  
92 complement after sequencing). Reads shorter than 36 bases were discarded. The trimmed  
93 fragment sequences were subsequently aligned to all known murine cDNA sequences  
94 using HISAT2 (version 2.1.0; settings: k=1000, --norc). The number of reported alignments,  
95 k, was given a high number in order to not miss any alignment results (some genes have up  
96 to 62 transcripts). Reads were only mapped to the forward strand (directional sequencing).  
97 Fragment sequences that mapped to multiple genes were removed (unknown origin).  
98 When fragments mapped to multiple transcripts from the same gene all but one were  
99 given a non-primary alignment flag by HISAT2 (flag 256). These flags were removed  
00 (subtraction of 256) by the same Perl script in order to be able to use the Bash-based shell  
01 script (dqRNASeq; see below) that is provided by Bioo Scientific (Perkin Elmer, MA, USA).  
02 Fragments that mapped to multiple transcripts from the same gene were considered  
03 unique and were counted for each of the transcripts. The number of unique fragments (or  
04 read pairs) was determined for each transcript using the script provided by Bioo Scientific  
05 (dqRNASeq; settings: s=8, q=0, m=1). Counts that were used for further analysis were  
06 based on a unique combination of start and stop positions and barcodes (USS + STL). The  
07 full data set is available as Supplemental Table S3 (Supplemental Material available online;  
08 see <https://figshare.com/s/26a93797d19154dc418a>).

## 10 **Data analyses and statistics**

11 All statistics were performed with GraphPad Prism 9.0. Nonparametric testing was used to  
12 compare groups in all experiments. For comparison of multiple-groups, a Kruskal wallis or

13 Friedman test was used for nonpaired or paired nonparametric data respectively with  
14 Dunn's correction for multiple testing. Differences in organoid size between groups were  
15 tested by using the average size of the organoids per independent experiment. Data are  
16 presented as median  $\pm$  range and p-values  $<0.05$  were considered significant.

17  
18 For RNA sequencing data, the principal component analyses were performed in R using the  
19 R package DESeq2 (version 1.26.0) (77) in order to visualize the overall effect of  
20 experimental covariates as well as batch effects (function: plotPCA). Differential gene  
21 expression analyses (treated vs. nontreated) was performed with the same R package  
22 (default settings; Negative Binomial GLM fitting and Wald statistics; design= $\sim$ condition),  
23 following standard normalization procedures. Transcripts with differential expression  $>2$   
24 (nylon-treated versus nontreated fibroblasts or epithelial cells) and a false discovery rate  
25 smaller than 0.05 (q value) were considered differentially expressed in that specific cell  
26 type. Volcano plots and clustering heat maps were made using BioJupies (78). Pathway  
27 analysis was done using Metascape (47).

## 30 References

- 32 1. J. Gasperi, S. L. Wright, R. Dris, F. Collard, C. Mandin, M. Guerrouache, V. Langlois, F. J.  
33 Kelly, B. Tassin, Microplastics in air: Are we breathing it in. *Current Opinion in*  
34 *Environmental Science & Health* **1**, 1-5 (2018).
- 35 2. C. M. Rochman, Microplastics research-from sink to source. *Science* **360**, 28-29 (2018).
- 36 3. I. E. Napper, A. Bakir, S. J. Rowland, R. C. Thompson, Characterisation, quantity and  
37 sorptive properties of microplastics extracted from cosmetics. *Mar Pollut Bull* **99**, 178-  
38 185 (2015).
- 39 4. A. L. Andrady, Microplastics in the marine environment. *Mar Pollut Bull* **62**, 1596-1605  
40 (2011).
- 41 5. V. Hidalgo-Ruz, L. Gutow, R. C. Thompson, M. Thiel, Microplastics in the marine  
42 environment: a review of the methods used for identification and quantification. *Environ*  
43 *Sci Technol* **46**, 3060-3075 (2012).
- 44 6. M. A. Browne, P. Crump, S. J. Niven, E. Teuten, A. Tonkin, T. Galloway, R. Thompson,  
45 Accumulation of microplastic on shorelines worldwide: sources and sinks. *Environ Sci*  
46 *Technol* **45**, 9175-9179 (2011).
- 47 7. J. C. Prata, J. P. da Costa, I. Lopes, A. C. Duarte, T. Rocha-Santos, Environmental exposure  
48 to microplastics: An overview on possible human health effects. *Sci Total Environ* **702**,  
49 134455 (2020).

- 50 8. S. L. Wright, F. J. Kelly, Plastic and Human Health: A Micro Issue? *Environ Sci Technol* **51**,  
51 6634-6647 (2017).
- 52 9. R. Dris, J. Gasperi, C. Mirande, C. Mandin, M. Guerrouache, V. Langlois, B. Tassin, A first  
53 overview of textile fibers, including microplastics, in indoor and outdoor environments.  
54 *Environmental Pollution* **221**, 453-458 (2017).
- 55 10. R. Dris, J. Gasperi, M. Saad, C. Mirande, B. Tassin, Synthetic fibers in atmospheric fallout:  
56 A source of microplastics in the environment? *Mar Pollut Bull* **104**, 290-293 (2016).
- 57 11. K. Donaldson, D. Brown, A. Clouter, R. Duffin, W. MacNee, L. Renwick, L. Tran, V. Stone,  
58 The pulmonary toxicology of ultrafine particles. *J Aerosol Med* **15**, 213-220 (2002).
- 59 12. G. Oberdorster, E. Oberdorster, J. Oberdorster, Nanotoxicology: an emerging discipline  
60 evolving from studies of ultrafine particles. *Environ Health Perspect* **113**, 823-839 (2005).
- 61 13. S. L. Wright, J. Ulke, A. Font, K. L. A. Chan, F. J. Kelly, Atmospheric microplastic deposition  
62 in an urban environment and an evaluation of transport. *Environ Int* **136**, 105411 (2020).
- 63 14. J. Pauly, S. Stegmeier, H. Allaart, R. Cheney, P. Zhang, A. Mayer, R. Streck, Inhaled  
64 cellulosic and plastic fibers found in human lung tissue. *Cancer Epidemiol Biomarkers*  
65 *Prev* **7**, 419-428 (1998).
- 66 15. J. Burkhardt, W. Jones, D. W. Porter, R. M. Washko, W. L. Eschenbacher, R. M. Castellan,  
67 Hazardous occupational exposure and lung disease among nylon flock workers. *Am J Ind*  
68 *Med Suppl* **1**, 145-146 (1999).
- 69 16. W. L. Eschenbacher, K. Kreiss, M. D. Lougheed, G. S. Pransky, B. Day, R. M. Castellan,  
70 Nylon flock-associated interstitial lung disease. *Am J Respir Crit Care Med* **159**, 2003-2008  
71 (1999).
- 72 17. S. R. Goldyn, R. Condos, W. N. Rom, The burden of exposure-related diffuse lung disease.  
73 *Semin Respir Crit Care Med* **29**, 591-602 (2008).
- 74 18. D. G. Kern, R. S. Crausman, K. T. Durand, A. Nayer, C. Kuhn, 3rd, Flock worker's lung:  
75 chronic interstitial lung disease in the nylon flocking industry. *Ann Intern Med* **129**, 261-  
76 272 (1998).
- 77 19. M. Shuchman, Secrecy in science: the flock worker's lung investigation. *Ann Intern Med*  
78 **129**, 341-344 (1998).
- 79 20. S. E. Turcotte, A. Chee, R. Walsh, F. C. Grant, G. M. Liss, A. Boag, L. Forkert, P. W. Munt,  
80 M. D. Lougheed, Flock worker's lung disease: natural history of cases and exposed  
81 workers in Kingston, Ontario. *Chest* **143**, 1642-1648 (2013).
- 82 21. R. M. Washko, B. Day, J. E. Parker, R. M. Castellan, K. Kreiss, Epidemiologic investigation  
83 of respiratory morbidity at a nylon flock plant. *Am J Ind Med* **38**, 628-638 (2000).
- 84 22. J. C. Pimentel, R. Avila, A. G. Lourenço, Respiratory disease caused by synthetic fibres: a  
85 new occupational disease. *Thorax* **30**, 204-219 (1975).
- 86 23. E. M. Cordasco, S. L. Demeter, J. Kerkay, H. S. Van Ordstrand, E. V. Lucas, T. Chen, J. A.  
87 Golish, Pulmonary manifestations of vinyl and polyvinyl chloride (interstitial lung  
88 disease). Newer aspects. *Chest* **78**, 828-834 (1980).
- 89 24. P. J. Kole, A. J. Löhr, F. Van Belleghem, A. M. J. Ragas, Wear and Tear of Tyres: A Stealthy  
90 Source of Microplastics in the Environment. *Int J Environ Res Public Health* **14**, (2017).
- 91 25. C. E. Enyoh, A. W. Verla, E. N. Verla, F. C. Ibe, C. E. Amaobi, Airborne microplastics: a  
92 review study on method for analysis, occurrence, movement and risks. *Environ Monit*  
93 *Assess* **191**, 668 (2019).
- 94 26. L. F. Amato-Lourenço, L. Dos Santos Galvão, L. A. de Weger, P. S. Hiemstra, M. G. Vijver,  
95 T. Mauad, An emerging class of air pollutants: Potential effects of microplastics to  
96 respiratory human health? *Sci Total Environ* **749**, 141676 (2020).

- 97 27. G. Favarato, H. R. Anderson, R. Atkinson, G. Fuller, I. Mills, H. Walton, Traffic-related  
98 pollution and asthma prevalence in children. Quantification of associations with nitrogen  
99 dioxide. *Air Qual Atmos Health* **7**, 459-466 (2014).
- 00 28. M. Guarnieri, J. R. Balmes, Outdoor air pollution and asthma. *Lancet* **383**, 1581-1592  
01 (2014).
- 02 29. C. A. Keet, J. P. Keller, R. D. Peng, Long-Term Coarse Particulate Matter Exposure Is  
03 Associated with Asthma among Children in Medicaid. *Am J Respir Crit Care Med* **197**, 737-  
04 746 (2018).
- 05 30. W. W. h. Organisation), *Microplastics in drinking-water* (World health Organisation,  
06 Geneva, 2019), vol. CC BY-NC-SA 3.0 IGO.
- 07 31. S. A. f. P. b. E. A. SAPEA, *A scientific perspective on microplastics in nature and society*  
08 (SAPEA, Berlin, 2019).
- 09 32. J. P. Ng-Blichfeldt, A. Schrik, R. K. Kortekaas, J. A. Noordhoek, I. H. Heijink, P. S. Hiemstra,  
10 J. Stolk, M. Königshoff, R. Gosens, Retinoic acid signaling balances adult distal lung  
11 epithelial progenitor cell growth and differentiation. *EBioMedicine*, (2018).
- 12 33. J. P. Ng-Blichfeldt, T. de Jong, R. K. Kortekaas, X. Wu, M. Lindner, V. Guryev, P. S.  
13 Hiemstra, J. Stolk, M. Königshoff, R. Gosens, TGF- $\beta$  activation impairs fibroblast ability to  
14 support adult lung epithelial progenitor cell organoid formation. *Am J Physiol Lung Cell*  
15 *Mol Physiol* **317**, L14-L28 (2019).
- 16 34. M. Cole, A novel method for preparing microplastic fibers. *Scientific Reports* **6**, (2016).
- 17 35. E. Gaston, M. Woo, C. Steele, S. Sukumaran, S. Anderson, Microplastics Differ Between  
18 Indoor and Outdoor Air Masses: Insights from Multiple Microscopy Methodologies. *Appl*  
19 *Spectrosc* **74**, 1079-1098 (2020).
- 20 36. S. O'Brien, E. D. Okoffo, J. W. O'Brien, F. Ribeiro, X. Wang, S. L. Wright, S. Samanipour, C.  
21 Rauert, T. Y. A. Toapanta, R. Albarracin, K. V. Thomas, Airborne emissions of microplastic  
22 fibres from domestic laundry dryers. *Sci Total Environ* **747**, 141175 (2020).
- 23 37. J. Zhang, L. Wang, K. Kannan, Microplastics in house dust from 12 countries and  
24 associated human exposure. *Environ Int* **134**, 105314 (2020).
- 25 38. Q. Zhang, Y. Zhao, F. Du, H. Cai, G. Wang, H. Shi, Microplastic Fallout in Different Indoor  
26 Environments. *Environ Sci Technol* **54**, 6530-6539 (2020).
- 27 39. B. L. Diffey, An overview analysis of the time people spend outdoors. *Br J Dermatol* **164**,  
28 848-854 (2011).
- 29 40. TIMA (Thermal Insulation Manufacturers Association), *Man-made Vitreous Fibers:*  
30 *Nomenclature, Chemical and Physical Properties* W. Eastes Ed (Nomenclature Committee  
31 of Thermal Insulation Manufacturers' Association, Refractory Ceramic Fibers Coalition  
32 (RCFC), Washington, DC, ed. 4th, 1993).
- 33 41. M. C. Basil, J. Katzen, A. E. Engler, M. Guo, M. J. Herriges, J. J. Kathiriya, R. Windmueller,  
34 A. B. Ysasi, W. J. Zacharias, H. A. Chapman, D. N. Kotton, J. R. Rock, H. W. Snoeck, G.  
35 Vunjak-Novakovic, J. A. Whitsett, E. E. Morrissey, The Cellular and Physiological Basis for  
36 Lung Repair and Regeneration: Past, Present, and Future. *Cell Stem Cell* **26**, 482-502  
37 (2020).
- 38 42. B. Hogan, C. Barkauskas, H. Chapman, J. Epstein, R. Jain, C. Hsia, L. Niklason, E. Calle, A.  
39 Le, S. Randell, J. Rock, M. Snitow, M. Krummel, B. Stripp, T. Vu, E. White, J. Whitsett, E.  
40 Morrissey, Repair and regeneration of the respiratory system: complexity, plasticity, and  
41 mechanisms of lung stem cell function. *Cell Stem Cell* **15**, 123-138 (2014).
- 42 43. C. E. Barkauskas, M. I. Chung, B. Fioret, X. Gao, H. Katsura, B. L. Hogan, Lung organoids:  
43 current uses and future promise. *Development* **144**, 986-997 (2017).



- 44 44. Y. Abe, M. Mutsuga, H. Ohno, Y. Kawamura, H. Akiyama, Isolation and Quantification of  
45 Polyamide Cyclic Oligomers in Kitchen Utensils and Their Migration into Various Food  
46 Simulants. *PLoS One* **11**, e0159547 (2016).
- 47 45. S. T. L. Sait, L. Sørensen, S. Kubowicz, K. Vike-Jonas, S. V. Gonzalez, A. G. Asimakopoulos,  
48 A. M. Booth, Microplastic fibres from synthetic textiles: Environmental degradation and  
49 additive chemical content. *Environ Pollut* **268**, 115745 (2021).
- 50 46. L. Sørensen, A. S. Groven, I. A. Hovsbakken, O. Del Puerto, D. F. Krause, A. Sarno, A. M.  
51 Booth, UV degradation of natural and synthetic microfibers causes fragmentation and  
52 release of polymer degradation products and chemical additives. *Sci Total Environ* **755**,  
53 143170 (2021).
- 54 47. Y. Zhou, B. Zhou, L. Pache, M. Chang, A. H. Khodabakhshi, O. Tanaseichuk, C. Benner, S. K.  
55 Chanda, Metascape provides a biologist-oriented resource for the analysis of systems-  
56 level datasets. *Nat Commun* **10**, 1523 (2019).
- 57 48. C. Di Sano, C. D'Anna, M. Ferraro, G. Chiappara, C. Sangiorgi, S. Di Vincenzo, A. Bertani, P.  
58 Vitulo, A. Bruno, P. Dino, E. Pace, Impaired activation of Notch-1 signaling hinders repair  
59 processes of bronchial epithelial cells exposed to cigarette smoke. *Toxicol Lett* **326**, 61-69  
60 (2020).
- 61 49. Y. Xing, A. Li, Z. Borok, C. Li, P. Minoo, NOTCH1 is required for regeneration of Clara cells  
62 during repair of airway injury. *Stem Cells* **30**, 946-955 (2012).
- 63 50. D. Lfkas, A. Shelton, C. Chiu, G. de Leon Boenig, Y. Chen, S. S. Stawicki, C. Siltanen, M.  
64 Reichelt, M. Zhou, X. Wu, J. Eastham-Anderson, H. Moore, M. Roose-Girma, Y. Chinn, J.  
65 Q. Hang, S. Warming, J. Egen, W. P. Lee, C. Austin, Y. Wu, J. Payandeh, J. B. Lowe, C. W.  
66 Siebel, Therapeutic antibodies reveal Notch control of transdifferentiation in the adult  
67 lung. *Nature* **528**, 127-131 (2015).
- 68 51. A. Sountoulidis, A. Stavropoulos, S. Giaglis, E. Apostolou, R. Monteiro, S. M. Chuva de  
69 Sousa Lopes, H. Chen, B. R. Stripp, C. Mummery, E. Andreakos, P. Sideras, Activation of  
70 the canonical bone morphogenetic protein (BMP) pathway during lung morphogenesis  
71 and adult lung tissue repair. *PLoS One* **7**, e41460 (2012).
- 72 52. C. Dean, M. Ito, H. P. Makarenkova, S. C. Faber, R. A. Lang, Bmp7 regulates branching  
73 morphogenesis of the lacrimal gland by promoting mesenchymal proliferation and  
74 condensation. *Development* **131**, 4155-4165 (2004).
- 75 53. Q. Tan, X. Y. Ma, W. Liu, J. A. Meridew, D. L. Jones, A. J. Haak, D. Sicard, G. Ligresti, D. J.  
76 Tschumperlin, Nascent Lung Organoids Reveal Epithelium- and Bone Morphogenetic  
77 Protein-mediated Suppression of Fibroblast Activation. *Am J Respir Cell Mol Biol* **61**, 607-  
78 619 (2019).
- 79 54. A. Caprioli, A. Villasenor, L. A. Wylie, C. Braitsch, L. Marty-Santos, D. Barry, C. M. Karner,  
80 S. Fu, S. M. Meadows, T. J. Carroll, O. Cleaver, Wnt4 is essential to normal mammalian  
81 lung development. *Dev Biol* **406**, 222-234 (2015).
- 82 55. E. M. M. Abdelwahab, J. Rapp, D. Feller, V. Csongei, S. Pal, D. Bartis, D. R. Thickett, J. E.  
83 Pongracz, Wnt signaling regulates trans-differentiation of stem cell like type 2 alveolar  
84 epithelial cells to type 1 epithelial cells. *Respir Res* **20**, 204 (2019).
- 85 56. N. R. Genuth, M. Barna, The Discovery of Ribosome Heterogeneity and Its Implications  
86 for Gene Regulation and Organismal Life. *Mol Cell* **71**, 364-374 (2018).
- 87 57. N. Kondrashov, A. Pusic, C. R. Stumpf, K. Shimizu, A. C. Hsieh, J. Ishijima, T. Shiroishi, M.  
88 Barna, Ribosome-mediated specificity in Hox mRNA translation and vertebrate tissue  
89 patterning. *Cell* **145**, 383-397 (2011).



- 90 58. O. Boucherat, J. Chakir, L. Jeannotte, The loss of Hoxa5 function promotes Notch-  
91 dependent goblet cell metaplasia in lung airways. *Biol Open* **1**, 677-691 (2012).
- 92 59. T. Yoshimi, N. Nakamura, S. Shimada, K. Iguchi, F. Hashimoto, K. Mochitate, Y. Takahashi,  
93 T. Miura, Homeobox B3, FoxA1 and FoxA2 interactions in epithelial lung cell  
94 differentiation of the multipotent M3E3/C3 cell line. *Eur J Cell Biol* **84**, 555-566 (2005).
- 95 60. A. Vianello, R. L. Jensen, L. Liu, J. Vollertsen, Simulating human exposure to indoor  
96 airborne microplastics using a Breathing Thermal Manikin. *Sci Rep* **9**, 8670 (2019).
- 97 61. P. N. Tsao, F. Chen, K. I. Izvolsky, J. Walker, M. A. Kukuruzinska, J. Lu, W. V. Cardoso,  
98 Gamma-secretase activation of notch signaling regulates the balance of proximal and  
99 distal fates in progenitor cells of the developing lung. *J Biol Chem* **283**, 29532-29544  
00 (2008).
- 01 62. J. S. Guseh, S. A. Bores, B. Z. Stanger, Q. Zhou, W. J. Anderson, D. A. Melton, J. Rajagopal,  
02 Notch signaling promotes airway mucous metaplasia and inhibits alveolar development.  
03 *Development* **136**, 1751-1759 (2009).
- 04 63. M. Morimoto, R. Nishinakamura, Y. Saga, R. Kopan, Different assemblies of Notch  
05 receptors coordinate the distribution of the major bronchial Clara, ciliated and  
06 neuroendocrine cells. *Development* **139**, 4365-4373 (2012).
- 07 64. M. Sauler, M. Gulati, Newly recognized occupational and environmental causes of  
08 chronic terminal airways and parenchymal lung disease. *Clin Chest Med* **33**, 667-680  
09 (2012).
- 10 65. D. W. Porter, V. Castranova, V. A. Robinson, A. F. Hubbs, R. R. Mercer, J. Scabilloni, T.  
11 Goldsmith, D. Schwegler-Berry, L. Battelli, R. Washko, J. Burkhart, C. Piacitelli, M.  
12 Whitmer, W. Jones, Acute inflammatory reaction in rats after intratracheal instillation of  
13 material collected from a nylon flocking plant. *J Toxicol Environ Health A* **57**, 25-45  
14 (1999).
- 15 66. D. B. Warheit, T. R. Webb, K. L. Reed, J. F. Hansen, G. L. Kennedy, Jr., Four-week  
16 inhalation toxicity study in rats with nylon respirable fibers: rapid lung clearance.  
17 *Toxicology* **192**, 189-210 (2003).
- 18 67. A. T. Branco, B. Lemos, High intake of dietary sugar enhances bisphenol A (BPA)  
19 disruption and reveals ribosome-mediated pathways of toxicity. *Genetics* **197**, 147-157  
20 (2014).
- 21 68. Y. Hu, J. P. Ng-Blichfeldt, C. Ota, C. Ciminieri, W. Ren, P. S. Hiemstra, J. Stolk, R. Gosens,  
22 M. Königshoff, Wnt/ $\beta$ -catenin signaling is critical for regenerative potential of distal lung  
23 epithelial progenitor cells in homeostasis and emphysema. *Stem Cells* **38**, 1467-1478  
24 (2020).
- 25 69. J. H. Lee, E. L. Rawlins, Developmental mechanisms and adult stem cells for therapeutic  
26 lung regeneration. *Dev Biol* **433**, 166-176 (2018).
- 27 70. G. Oberdörster, Toxicokinetics and effects of fibrous and nonfibrous particles. *Inhal*  
28 *Toxicol* **14**, 29-56 (2002).
- 29 71. L. Florez-Sampedro, S. Song, B. Melgert, The diversity of myeloid immune cells shaping  
30 wound repair and fibrosis in the lung. *Regeneration (Oxf)* **5**, 3-25 (2018).
- 31 72. J. Choi, J. E. Park, G. Tsagkogeorga, M. Yanagita, B. K. Koo, N. Han, J. H. Lee, Inflammatory  
32 Signals Induce AT2 Cell-Derived Damage-Associated Transient Progenitors that Mediate  
33 Alveolar Regeneration. *Cell Stem Cell* **27**, 366-382.e367 (2020).
- 34 73. R. R. Mercer, M. L. Russell, V. L. Roggli, J. D. Crapo, Cell number and distribution in  
35 human and rat airways. *Am J Respir Cell Mol Biol* **10**, 613-624 (1994).

- 36 74. A. Ragusa, A. Svelato, C. Santacroce, P. Catalano, V. Notarstefano, O. Carnevali, F. Papa,  
37 M. C. A. Rongioletti, F. Baiocco, S. Draghi, E. D'Amore, D. Rinaldo, M. Matta, E. Giorgini,  
38 Plasticenta: First evidence of microplastics in human placenta. *Environ Int* **146**, 106274  
39 (2021).  
40 75. S. Andrew. (2010).  
41 76. M. Martin, Cutadapt removes adapter sequences from high-throughput sequencing  
42 reads. *2011* **17**, 3 (2011).  
43 77. M. I. Love, W. Huber, S. Anders, Moderated estimation of fold change and dispersion for  
44 RNA-seq data with DESeq2. *Genome Biol* **15**, 550 (2014).  
45 78. D. Torre, A. Lachmann, A. Ma'ayan, BioJupies: Automated Generation of Interactive  
46 Notebooks for RNA-Seq Data Analysis in the Cloud. *Cell Syst* **7**, 556-561.e553 (2018).  
47 79. P. Peets, I. Leito, J. Pelt, S. Vahur, Identification and classification of textile fibres using  
48 ATR-FT-IR spectroscopy with chemometric methods. *Spectrochim Acta A Mol Biomol*  
49 *Spectrosc* **173**, 175-181 (2017).  
50

51

## 52 **Acknowledgments**

53 **General:** The authors thank Habibie (University of Groningen, Department of Molecular  
54 Pharmacology) for his help with the human organoid experiments, Imco Sibum, Paul  
55 Hagedoorn, and Anko Eissens (University of Groningen, Department of Pharmaceutical  
56 Technology and Biopharmacy) for their assistance at the scanning electron microscope,  
57 Andreas W. Ehlers (University of Amsterdam, Van 't Hoff Institute for Molecular Sciences)  
58 for his assistance with the NMR spectroscopy, and Elena Höppener (TNO, Department  
59 Environmental Modeling Sensing and Analysis) for the energy dispersive X-ray and  
60 infrared spectroscopy analysis of the microfibers.

61

62 **Funding:** ZonMW is gratefully acknowledged for their financial support with  
63 Microplastics and Health grant 458001013.

64

## 65 **Author contributions:**

66 FD: Study design, collection and assembly of data, data analysis and interpretation,  
67 manuscript writing, critical reading and revision.

68 SS: Collection and assembly of data, data analysis and interpretation, critical reading and  
69 revision.

70 GE: Collection and assembly of data, data analysis and interpretation, critical reading and  
71 revision.

72 XW: Collection and assembly of data, data analysis and interpretation, critical reading  
73 and revision.

74 IB: Collection and assembly of data, critical reading and revision.

75 DB: Collection and assembly of data, data analysis and interpretation, experimental  
76 material support, critical reading and revision.

77 IK: Collection and assembly of data, data analysis and interpretation, experimental  
78 material support, critical reading and revision.

79 DS: Collection and assembly of data, data analysis and interpretation, experimental  
80 material support, critical reading and revision.

81 RW: Collection and assembly of data, data analysis and interpretation, experimental  
82 material support, critical reading and revision.

83 MC: Collection and assembly of data, data analysis and interpretation, experimental  
84 material support, critical reading and revision.

85 AS: Data analysis and interpretation, critical reading and revision.

86 RG: Data analysis and interpretation, study design, experimental material support, critical  
87 reading and revision.

88 BM: Collection and assembly of data, study design, data analysis and interpretation,  
89 financial support, manuscript writing, critical reading and revision.

90  
91 **Competing interests:** The authors declare no competing interests.

92  
93 **Data and materials availability:** All data needed to evaluate the conclusions in the paper are  
94 present in the paper and/or the Supplementary Materials. Additional data related to this  
95 paper may be requested from the authors.

## 99 **Supplementary Materials and methods**

00

### 01 **Energy dispersive X-ray spectroscopy**

02 Samples were prepared for energy dispersive X-ray (EDX) spectroscopy analysis on an  
03 aluminium sample holder using adhesive carbon coated tape. Excessive microfibers were  
04 removed using pressurized air, after which the samples were sputter coated with 10 nm  
05 of carbon. The EDX measurements were performed with a Tescan MAIA III GMH field  
06 emission scanning electron microscope (Czech Republic) equipped with a Bruker X-Flash  
07 30 mm<sup>2</sup> silicon drift energy dispersive X-ray microanalysis detector (MA, USA).

08

### 09 **Micro-Fourier transform infrared spectroscopy**

10 Micro-Fourier transform infrared spectroscopy ( $\mu$ FTIR) measurements were performed  
11 using a Thermo Nicolet iN10 micro Fourier transform infrared microscope. Spectra were  
12 recorded in the wavelength range from 4000 to 675 cm<sup>-1</sup> using a spectral resolution of 8  
13 cm<sup>-1</sup>. For the transmission measurements of the polyester reference material and the  
14 polyester and nylon environmental fibers, a small amount of the microfibers was  
15 transferred onto a diamond micro compression cell where the samples were  
16 compressed. For the reflection measurements of the nylon reference material and the  
17 polyester and nylon environmental fibers, a small portion of microfibers was suspended  
18 in water. The suspension was subsequently filtered over a gold coated 0.8  $\mu$ m  
19 polycarbonate filter (TJ Environmental, The Netherlands). A subset of approximately 100  
20 fibers was individually measured directly on the filter using the reflection mode of the  $\mu$ -  
21 FTIR equipment.

22

### 23 **Extraction of nylon oligomers (mono-, di- and trimer)**

24 A round bottom flask containing 25.1 g cryogenically milled nylon powder (PA66, Sigma-  
25 Aldrich) and 500 ml methanol (VWR) was equipped with a reflux condenser and the  
26 suspension was stirred overnight at 50°C. Next, the suspension was cooled to  
27 approximately 30°C and filtered over a cellulose filter (VWR) to remove the remaining

28 powder. The solvent was removed *in vacuo* using a rotary evaporator (Büchi rotavapor R-  
29 215, Switzerland). A white solid was obtained (yield 220 mg), of which the composition  
30 was determined using liquid chromatography/mass spectrometry (LC/MS) analysis.

### 31 **Isolation of nylon oligomers (mono-, di- and trimer)**

32 A column for silica gel chromatography ( $\varnothing$  30 mm, VWR) was charged with silica gel 60  
33 (27 g, 0.063-0.200 mm, Merck) and dichloromethane (DCM, VWR) as eluent. The crude  
34 extract containing the mixture of oligomers (200 mg) was added on top of the silica gel  
35 column and oligomers were separated on the column using DCM:methanol as eluent  
36 (DCM:MeOH gradient: 100:0  $\rightarrow$  90:10  $\rightarrow$  80:20), which resulted in complete separation  
37 of the oligomers. The collected fractions were checked for the presence of product using  
38 LC/MS. The fractions containing pure oligomer were combined, filtered over a glass filter  
39 (VWR) and subsequently the solvent was removed *in vacuo*. The obtained solids were  
40 further dried *in vacuo*, after which the pure oligomers were obtained as white solids. The  
41 structure of the oligomers was confirmed by  $^1\text{H}$  NMR spectroscopy.

### 43 **Liquid chromatography/mass spectrometry**

#### 44 *Qualitative analysis of nylon leachate and oligomers*

45 Qualitative analysis of nylon oligomers was performed with an Agilent 1260 series high-  
46 performance liquid chromatographer (CA, USA) equipped with a 100 x 2 mm, 3  $\mu\text{m}$   
47 Gemini NX-C18 110 Å LC Column (Phenomenex, Utrecht, The Netherlands), coupled with  
48 an Agilent 6410 triple quadrupole LC/MS with electron spray ionization (ESI) in positive  
49 SCAN mode. In addition, the LC/MS analysis of the nylon leachate was performed with  
50 the Agilent 1260 liquid chromatographer coupled to an Agilent 6460 triple quadrupole  
51 LC/MS with Jetstream ESI in positive SCAN mode. A sample volume of 5  $\mu\text{l}$  was injected  
52 with a column temperature of 60  $^\circ\text{C}$  and a flow rate of 200  $\mu\text{l min}^{-1}$ . The sample was  
53 eluted with a gradient of Milli-Q water (containing 5 mM ammonium formate with  
54 0.0025% formic acid (both Sigma-Aldrich), eluent A) and methanol (containing 5 mM  
55 ammonium formate with 0.0025% formic acid, eluent B) with a flow rate of 0.5  $\text{ml min}^{-1}$ .  
56 Eluent B was increased from 10% to 90% in 10 minutes and maintained for 3 minutes.  
57 After this, eluent B was decreased to 10% in 0.1 minute and maintained for 1.9 minute to

58 complete the cycle of 15 minutes. Mass spectrometry was performed with a gas  
59 temperature of 350°C and a flow rate of 10 l min<sup>-1</sup>. Stealth gas temperature (for Agilent  
60 6460) was set at 400 °C with a flow rate of 12 l min<sup>-1</sup>. The capillary voltage was set at  
61 4000 V.  
62

63 *Direct injection of nylon leachate*

64 An injection volume of 10  $\mu$ l diluted nylon leachate was directly injected into an Agilent  
65 6410 triple quadrupole MS system with ESI in positive SCAN mode. The conditions were  
66 as follows: gas temperature 350  $^{\circ}$ C, flow rate 10 l min<sup>-1</sup>, mobile phase 50:50 ratio of  
67 80:20 acetonitrile (VWR):Milli-Q water with 5 mM ammonium formate and 10:90  
68 acetonitrile:Milli-Q water with 5 mM ammonium formate, scan range 50–1000 Da,  
69 capillary voltage 3500 V.

70  
71 **<sup>1</sup>H Nuclear magnetic resonance**

72 The chemical structure of the oligomers was confirmed by <sup>1</sup>H NMR spectroscopy (Bruker  
73 Avance 400 spectrometer). The oligomers were dissolved in ~0.5 ml CD<sub>3</sub>OD:CDCl<sub>3</sub> (1:1)  
74 (Sigma-Aldrich). The spectra were recorded at 24  $^{\circ}$ C, and internally referenced to the  
75 residual solvent resonance (CD<sub>3</sub>OD: <sup>1</sup>H  $\delta$  3.31).

76 Nylon monomer, yield = 77 mg. <sup>1</sup>H NMR (400.1 MHz, CD<sub>3</sub>OD/CDCl<sub>3</sub> 50:50, 297 K)  $\delta$  = 7.56  
77 (br. m, 2H; NHCO), 3.22 (m, 4H, NHCH<sub>2</sub>), 2.19 (m, 4H, COCH<sub>2</sub>), 1.63 (m, 4H, COCH<sub>2</sub>CH<sub>2</sub>),  
78 1.54 (m, 4H, NHCH<sub>2</sub>CH<sub>2</sub>), 1.32 (m, 4H, NH (CH<sub>2</sub>)<sub>2</sub>CH<sub>2</sub>).

79 Nylon dimer, yield = 74 mg. <sup>1</sup>H NMR (400.1 MHz, CD<sub>3</sub>OD/CDCl<sub>3</sub> 50:50, 297 K)  $\delta$  = 7.68 (br.  
80 m, 4H; NHCO), 3.15 (t, 8H, NHCH<sub>2</sub>), 2.18 (m, 8H, COCH<sub>2</sub>), 1.60 (m, 8H, COCH<sub>2</sub>CH<sub>2</sub>), 1.47  
81 (m, 8H, NHCH<sub>2</sub>CH<sub>2</sub>), 1.31 (m, 8H, NH (CH<sub>2</sub>)<sub>2</sub>CH<sub>2</sub>).

82 Nylon trimer, yield = 16 mg. <sup>1</sup>H NMR (400.1 MHz, CD<sub>3</sub>OD/CDCl<sub>3</sub> 50:50, 297 K)  $\delta$  = 7.74 (br.  
83 m, 6H; NHCO), 3.14 (t, 12H, NHCH<sub>2</sub>), 2.18 (m, 12H, COCH<sub>2</sub>), 1.60 (m, 12H, COCH<sub>2</sub>CH<sub>2</sub>),  
84 1.48 (m, 12H, NHCH<sub>2</sub>CH<sub>2</sub>), 1.32 (m, 12H, NH (CH<sub>2</sub>)<sub>2</sub>CH<sub>2</sub>).



87 **Supplementary tables and figures**

88

89

**Table S1.** Size characteristics of polyester and nylon reference microfibers.

|                | Microfiber size<br>Diameter x length ( $\mu\text{m}$ ) |       |
|----------------|--------------------------------------------------------|-------|
|                | Polyester                                              | Nylon |
| 25% percentile | 14x50                                                  | 11x29 |
| Median         | 15x52                                                  | 12x31 |
| 75% percentile | 15x53                                                  | 12x32 |
| Minimum        | 13x22                                                  | 9x24  |
| Maximum        | 18x64                                                  | 14x74 |

90

91

92

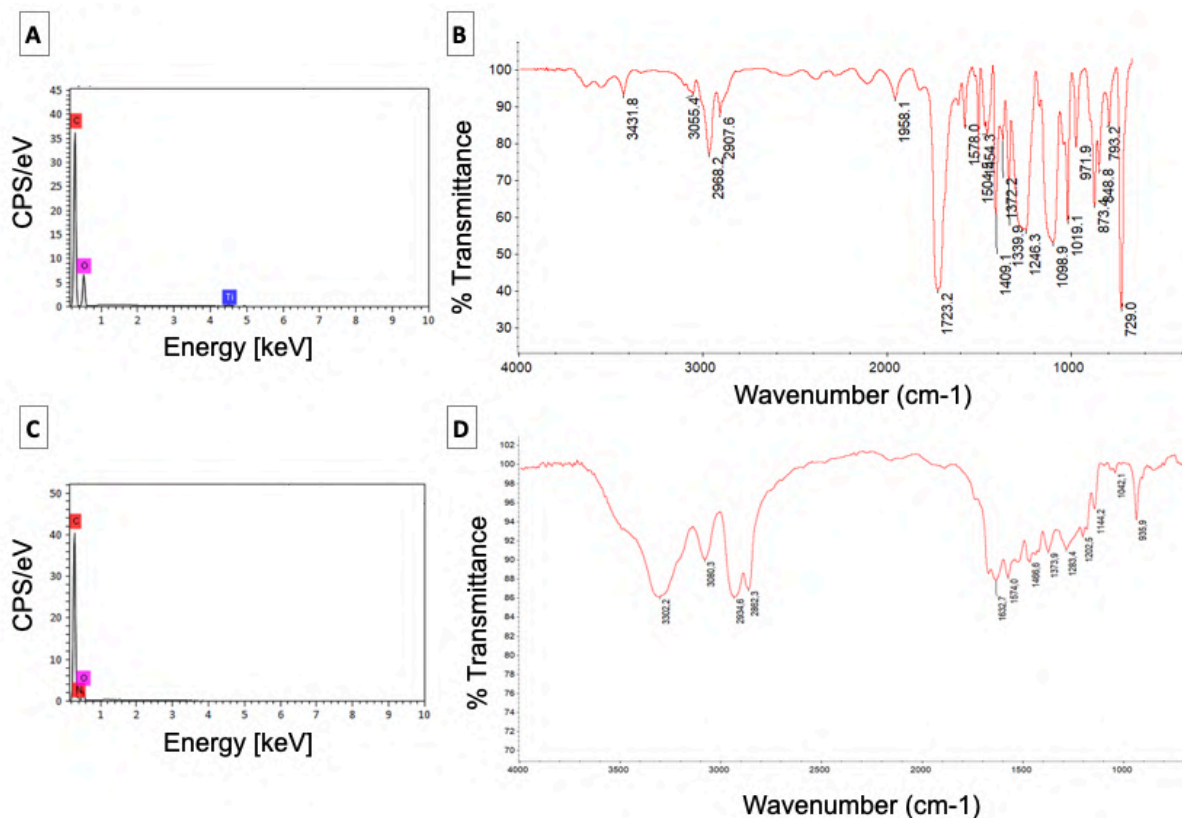

93

94

95

96

97

98

99

00

01

02

03

04

**Figure S1: Characterization of the reference microfibers using energy dispersive X-ray - and infrared spectroscopy. (A)** EDX spectrum of polyester, confirming the presence of carbon (C) and oxygen (O), and additionally revealing the presence of titanium (Ti), which can be ascribed to small  $\text{TiO}_2$  pigment particles used as filler material in these fibers. **(B)**  $\mu$ FTIR spectrum of polyester with characteristic absorbance peaks (2968  $\text{cm}^{-1}$ , C-H stretch; 1723  $\text{cm}^{-1}$ , C=O stretch; 1246  $\text{cm}^{-1}$ , C-O stretch aromatic ester; 729  $\text{cm}^{-1}$ , benzene derivative (79)). **(C)** EDX spectrum of nylon, confirming the presence of carbon (C), nitrogen (N) and oxygen (O). **(D)**  $\mu$ FTIR spectrum of nylon with characteristic nylon absorbance peaks (3302  $\text{cm}^{-1}$ , N-H stretch; 2934  $\text{cm}^{-1}$ , C-H stretch; 1632  $\text{cm}^{-1}$ , C=O stretch sec. amide; 1202  $\text{cm}^{-1}$ , C-N bend (79)).

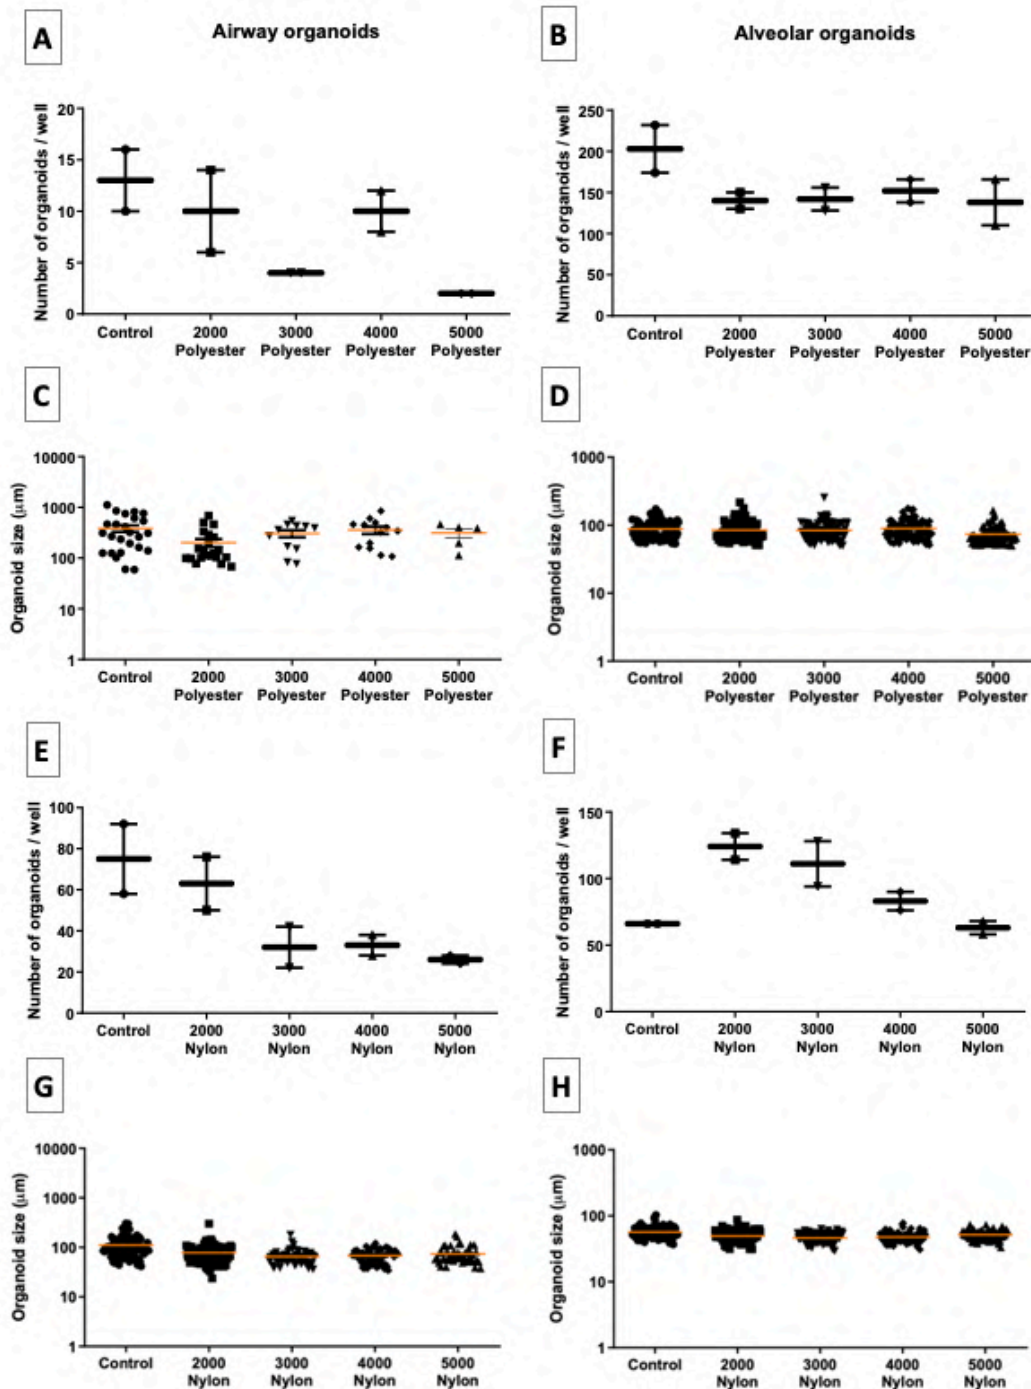

05  
06 **Figure S2: Determination of the optimal microfiber dose for subsequent in vitro testing**  
07 **of polyester and nylon reference microfibers, using 2000, 3000, 4000 and 5000**  
08 **microfibers per condition. (A, E) Quantification of airway and (B, F) alveolar organoid**  
09 **numbers for organoids exposed to polyester or nylon, respectively (n=2 independent**  
10 **isolations). (C, G) Quantification of the airway and (D, H) alveolar organoid size following**  
11 **exposure to polyester or nylon. 2000, 3000, 4000 or 5000 fibers per well corresponded to**

12 approximately 49, 73, 98 and 122  $\mu\text{g/ml}$  of polyester fibers or 16, 23, 31, and 39  $\mu\text{g/ml}$  of  
13 nylon fibers.

14 **Table S2.** Size characteristics of polyester and nylon environmental microfibers.

|                | Microfiber size<br>Diameter x length ( $\mu\text{m}$ ) |                     |
|----------------|--------------------------------------------------------|---------------------|
|                | Environmental polyester                                | Environmental nylon |
| 25% percentile | 15x54                                                  | 46x15               |
| Median         | 17x63                                                  | 57x20               |
| 75% percentile | 18x85                                                  | 73x27               |
| Minimum        | 8x30                                                   | 17x8                |
| Maximum        | 24x269                                                 | 296x66              |

15  
16

17

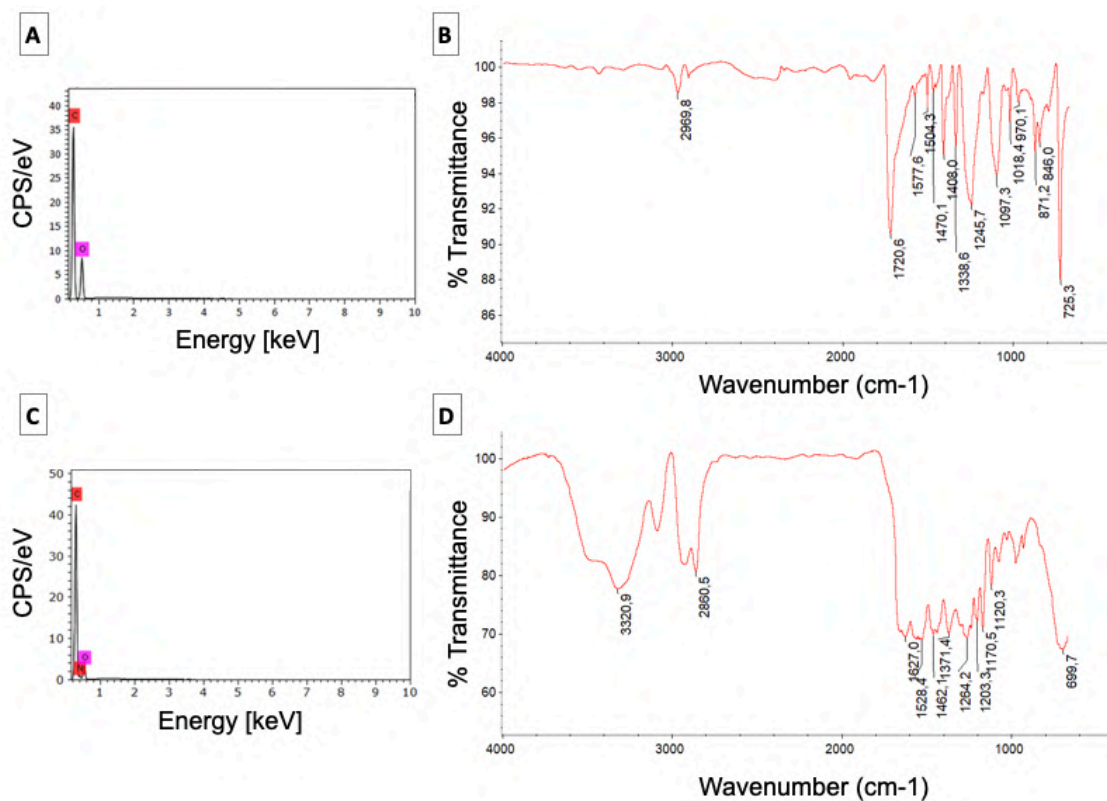

18

19

20

21

**Figure S3: Characterization of the environmental microfibers using energy dispersive X-ray - and infrared spectroscopy. EDX - and  $\mu$ -FTIR spectra of (A and B) polyester and (C and D) nylon microfibers.**

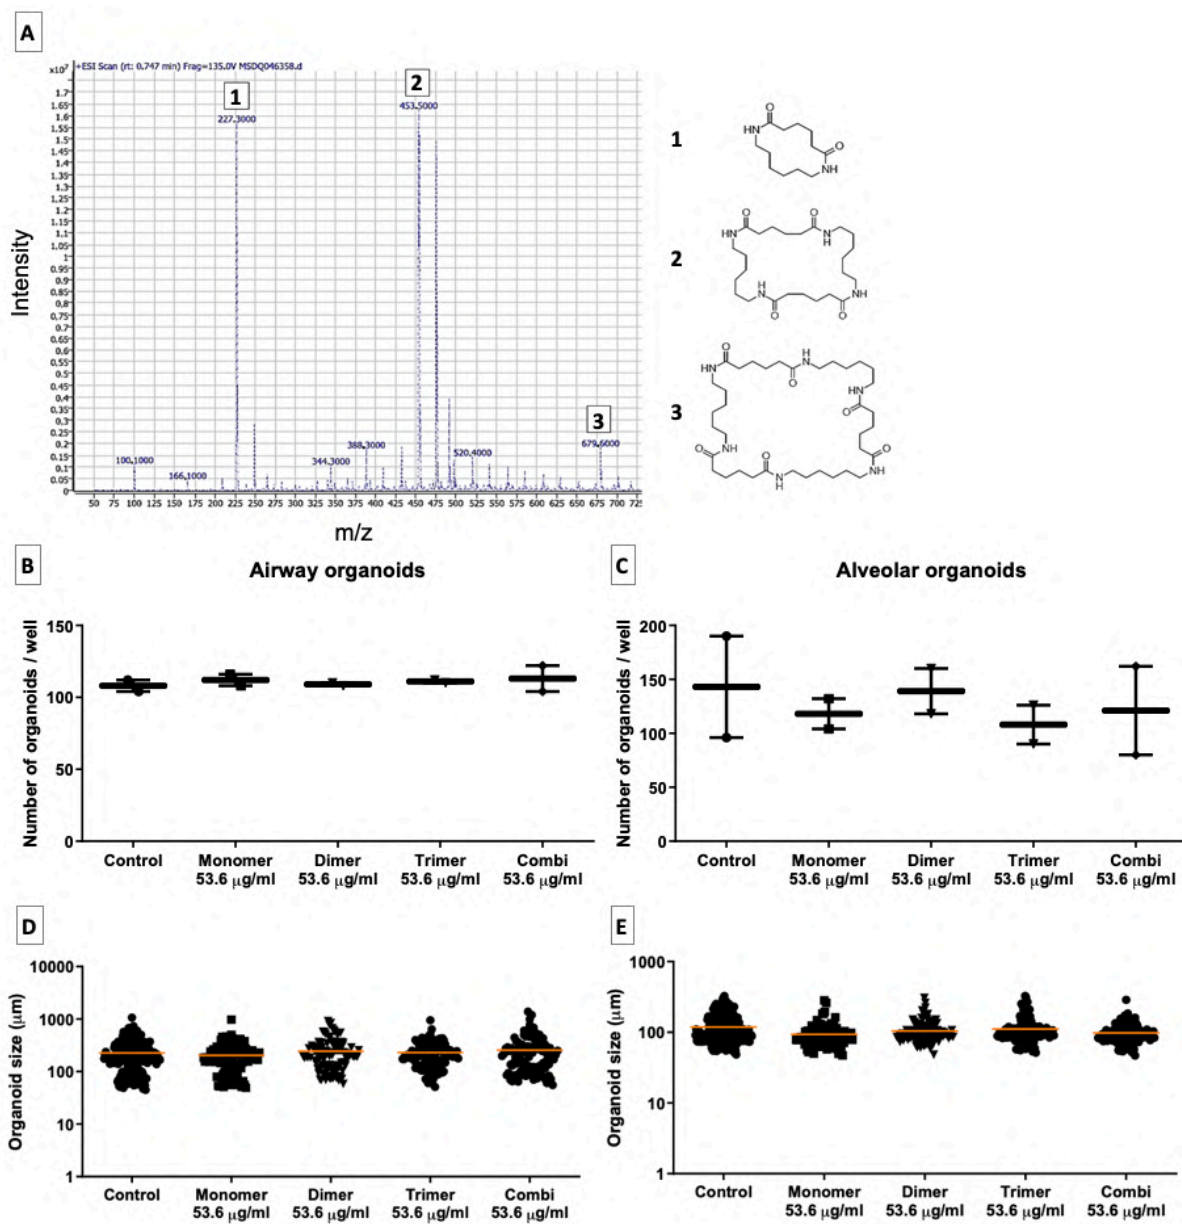

22  
23 **Figure S4: Characterization of the components leaching from nylon reference**  
24 **microfibers and their effect on organoid growth.** (A) Mass spectrometry spectrum of the  
25 nylon leachate, revealing high amounts of cyclic nylon mono-, di- and trimers, as well as  
26 other smaller peaks. (B and C) Assessment of the numbers of airway and alveolar  
27 organoids and (D and E) their sizes ( $n=2$  independent isolations).



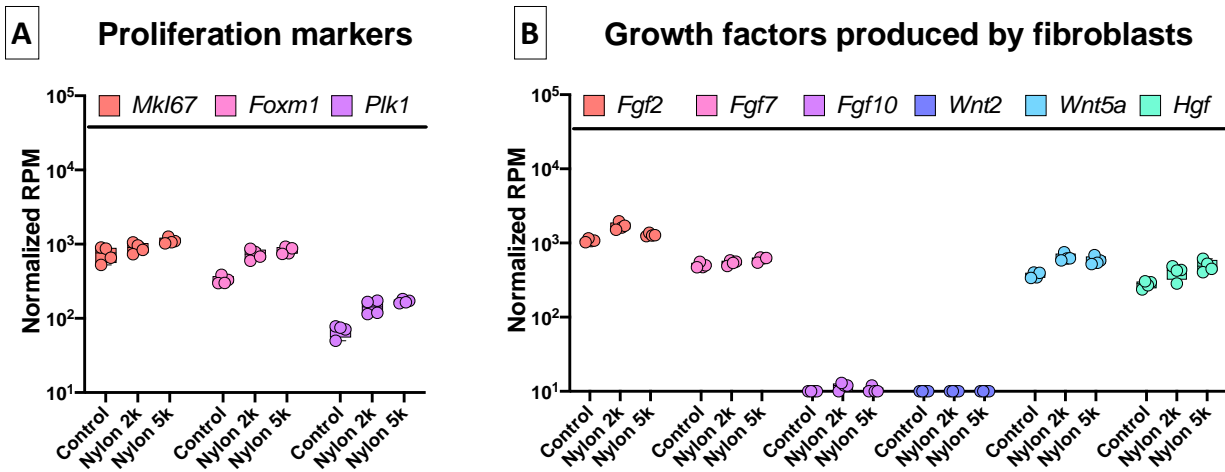

31

32

33

34

35

36

37

**Figure S5: Expression of individual genes in fibroblasts isolated from organoid cultures exposed to nylon microfibers. (A) Genes associated with proliferation of fibroblasts. (B) Genes encoding factors produced by fibroblasts important for epithelial development (n=4 independent isolations). 2k= 2000 fibers, 5k=5000 fibers**

## 38 Supplemental materials and methods

39

### 40 Energy dispersive X-ray spectroscopy

41 Samples were prepared for energy dispersive X-ray (EDX) spectroscopy analysis on an  
42 aluminium sample holder using adhesive carbon coated tape. Excessive microfibers were  
43 removed using pressurized air, after which the samples were sputter coated with 10 nm  
44 of carbon. The EDX measurements were performed with a Tescan MAIA III GMH field  
45 emission scanning electron microscope (Czech Republic) equipped with a Bruker X-Flash  
46 30 mm<sup>2</sup> silicon drift energy dispersive X-ray microanalysis detector (MA, USA).

47

### 48 Micro-Fourier transform infrared spectroscopy

49 Micro-Fourier transform infrared spectroscopy ( $\mu$ FTIR) measurements were performed  
50 using a Thermo Nicolet iN10 micro Fourier transform infrared microscope. Spectra were  
51 recorded in the wavelength range from 4000 to 675 cm<sup>-1</sup> using a spectral resolution of 8  
52 cm<sup>-1</sup>. For the transmission measurements of the polyester reference material and the  
53 polyester and nylon environmental fibers, a small amount of the microfibers was  
54 transferred onto a diamond micro compression cell where the samples were  
55 compressed. For the reflection measurements of the nylon reference material and the  
56 polyester and nylon environmental fibers, a small portion of microfibers was suspended  
57 in water. The suspension was subsequently filtered over a gold coated 0.8  $\mu$ m  
58 polycarbonate filter (TJ Environmental, The Netherlands). A subset of approximately 100  
59 fibers was individually measured directly on the filter using the reflection mode of the  $\mu$ -  
60 FTIR equipment.

61

### 62 Extraction of nylon oligomers (mono-, di- and trimer)

63 A round bottom flask containing 25.1 g cryogenically milled nylon powder (PA66, Sigma-  
64 Aldrich) and 500 ml methanol (VWR) was equipped with a reflux condenser and the  
65 suspension was stirred overnight at 50°C. Next, the suspension was cooled to  
66 approximately 30°C and filtered over a cellulose filter (VWR) to remove the remaining

67 powder. The solvent was removed *in vacuo* using a rotary evaporator (Büchi rotavapor R-  
68 215, Switzerland). A white solid was obtained (yield 220 mg), of which the composition  
69 was determined using liquid chromatography/mass spectrometry (LC/MS) analysis.

### 70 **Isolation of nylon oligomers (mono-, di- and trimer)**

71 A column for silica gel chromatography ( $\varnothing$  30 mm, VWR) was charged with silica gel 60  
72 (27 g, 0.063-0.200 mm, Merck) and dichloromethane (DCM, VWR) as eluent. The crude  
73 extract containing the mixture of oligomers (200 mg) was added on top of the silica gel  
74 column and oligomers were separated on the column using DCM:methanol as eluent  
75 (DCM:MeOH gradient: 100:0  $\rightarrow$  90:10  $\rightarrow$  80:20), which resulted in complete separation  
76 of the oligomers. The collected fractions were checked for the presence of product using  
77 LC/MS. The fractions containing pure oligomer were combined, filtered over a glass filter  
78 (VWR) and subsequently the solvent was removed *in vacuo*. The obtained solids were  
79 further dried *in vacuo*, after which the pure oligomers were obtained as white solids. The  
80 structure of the oligomers was confirmed by  $^1\text{H}$  NMR spectroscopy.

### 82 **Liquid chromatography/mass spectrometry**

#### 83 *Qualitative analysis of nylon leachate and oligomers*

84 Qualitative analysis of nylon oligomers was performed with an Agilent 1260 series high-  
85 performance liquid chromatographer (CA, USA) equipped with a 100 x 2 mm, 3  $\mu\text{m}$   
86 Gemini NX-C18 110 Å LC Column (Phenomenex, Utrecht, The Netherlands), coupled with  
87 an Agilent 6410 triple quadrupole LC/MS with electron spray ionization (ESI) in positive  
88 SCAN mode. In addition, the LC/MS analysis of the nylon leachate was performed with  
89 the Agilent 1260 liquid chromatographer coupled to an Agilent 6460 triple quadrupole  
90 LC/MS with Jetstream ESI in positive SCAN mode. A sample volume of 5  $\mu\text{l}$  was injected  
91 with a column temperature of 60  $^\circ\text{C}$  and a flow rate of 200  $\mu\text{l min}^{-1}$ . The sample was  
92 eluted with a gradient of Milli-Q water (containing 5 mM ammonium formate with  
93 0.0025% formic acid (both Sigma-Aldrich), eluent A) and methanol (containing 5 mM  
94 ammonium formate with 0.0025% formic acid, eluent B) with a flow rate of 0.5  $\text{ml min}^{-1}$ .  
95 Eluent B was increased from 10% to 90% in 10 minutes and maintained for 3 minutes.  
96 After this, eluent B was decreased to 10% in 0.1 minute and maintained for 1.9 minute to

97 complete the cycle of 15 minutes. Mass spectrometry was performed with a gas  
98 temperature of 350°C and a flow rate of 10 l min<sup>-1</sup>. Stealth gas temperature (for Agilent  
99 6460) was set at 400 °C with a flow rate of 12 l min<sup>-1</sup>. The capillary voltage was set at  
00 4000 V.

### 01 *Direct injection of nylon leachate*

02  
03 An injection volume of 10 µl diluted nylon leachate was directly injected into an Agilent  
04 6410 triple quadrupole MS system with ESI in positive SCAN mode. The conditions were  
05 as follows: gas temperature 350 °C, flow rate 10 l min<sup>-1</sup>, mobile phase 50:50 ratio of  
06 80:20 acetonitrile (VWR):Milli-Q water with 5 mM ammonium formate and 10:90  
07 acetonitrile:Milli-Q water with 5 mM ammonium formate, scan range 50–1000 Da,  
08 capillary voltage 3500 V.

### 09 **<sup>1</sup>H Nuclear magnetic resonance**

10  
11 The chemical structure of the oligomers was confirmed by <sup>1</sup>H NMR spectroscopy (Bruker  
12 Avance 400 spectrometer). The oligomers were dissolved in ~0.5 ml CD<sub>3</sub>OD:CDCl<sub>3</sub> (1:1)  
13 (Sigma-Aldrich). The spectra were recorded at 24 °C, and internally referenced to the  
14 residual solvent resonance (CD<sub>3</sub>OD: <sup>1</sup>H δ 3.31).

15 Nylon monomer, yield = 77 mg. <sup>1</sup>H NMR (400.1 MHz, CD<sub>3</sub>OD/CDCl<sub>3</sub> 50:50, 297 K) δ = 7.56  
16 (br. m, 2H; NHCO), 3.22 (m, 4H, NHCH<sub>2</sub>), 2.19 (m, 4H, COCH<sub>2</sub>), 1.63 (m, 4H, COCH<sub>2</sub>CH<sub>2</sub>),  
17 1.54 (m, 4H, NHCH<sub>2</sub>CH<sub>2</sub>), 1.32 (m, 4H, NH (CH<sub>2</sub>)<sub>2</sub>CH<sub>2</sub>).

18 Nylon dimer, yield = 74 mg. <sup>1</sup>H NMR (400.1 MHz, CD<sub>3</sub>OD/CDCl<sub>3</sub> 50:50, 297 K) δ = 7.68 (br.  
19 m, 4H; NHCO), 3.15 (t, 8H, NHCH<sub>2</sub>), 2.18 (m, 8H, COCH<sub>2</sub>), 1.60 (m, 8H, COCH<sub>2</sub>CH<sub>2</sub>), 1.47  
20 (m, 8H, NHCH<sub>2</sub>CH<sub>2</sub>), 1.31 (m, 8H, NH (CH<sub>2</sub>)<sub>2</sub>CH<sub>2</sub>).

21 Nylon trimer, yield = 16 mg. <sup>1</sup>H NMR (400.1 MHz, CD<sub>3</sub>OD/CDCl<sub>3</sub> 50:50, 297 K) δ = 7.74 (br.  
22 m, 6H; NHCO), 3.14 (t, 12H, NHCH<sub>2</sub>), 2.18 (m, 12H, COCH<sub>2</sub>), 1.60 (m, 12H, COCH<sub>2</sub>CH<sub>2</sub>),  
23 1.48 (m, 12H, NHCH<sub>2</sub>CH<sub>2</sub>), 1.32 (m, 12H, NH (CH<sub>2</sub>)<sub>2</sub>CH<sub>2</sub>).

26 **Supplementary tables and figures**

27

28

**Table S1.** Size characteristics of polyester and nylon reference microfibers.

|                | Microfiber size<br>Diameter x length ( $\mu\text{m}$ ) |       |
|----------------|--------------------------------------------------------|-------|
|                | Polyester                                              | Nylon |
| 25% percentile | 14x50                                                  | 11x29 |
| Median         | 15x52                                                  | 12x31 |
| 75% percentile | 15x53                                                  | 12x32 |
| Minimum        | 13x22                                                  | 9x24  |
| Maximum        | 18x64                                                  | 14x74 |

29

30

31

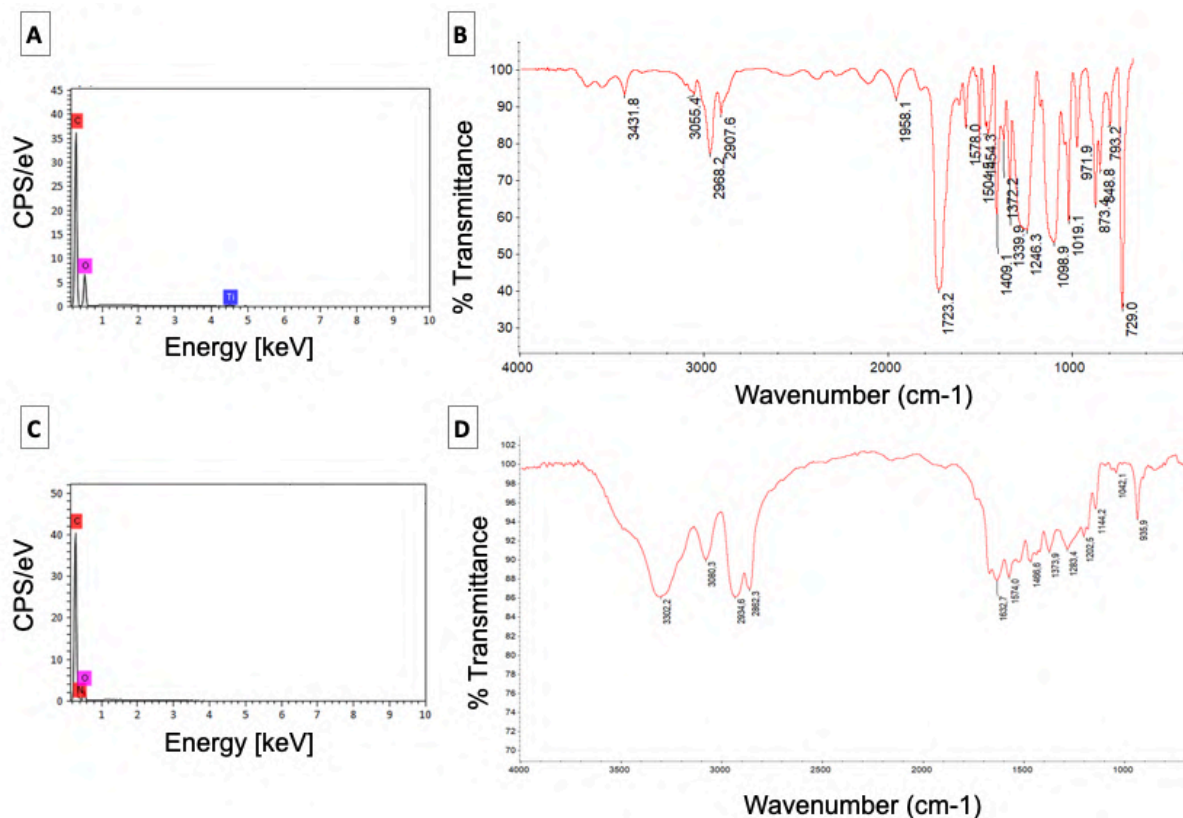

32

33

34

35

36

37

38

39

40

41

42

43

**Figure S1: Characterization of the reference microfibers using energy dispersive X-ray - and infrared spectroscopy. (A)** EDX spectrum of polyester, confirming the presence of carbon (C) and oxygen (O), and additionally revealing the presence of titanium (Ti), which can be ascribed to small TiO<sub>2</sub> pigment particles used as filler material in these fibers. **(B)**  $\mu$ FTIR spectrum of polyester with characteristic absorbance peaks (2968 cm<sup>-1</sup>, C-H stretch; 1723 cm<sup>-1</sup>, C=O stretch; 1246 cm<sup>-1</sup>, C-O stretch aromatic ester; 729 cm<sup>-1</sup>, benzene derivative (79)). **(C)** EDX spectrum of nylon, confirming the presence of carbon (C), nitrogen (N) and oxygen (O). **(D)**  $\mu$ FTIR spectrum of nylon with characteristic nylon absorbance peaks (3302 cm<sup>-1</sup>, N-H stretch; 2934 cm<sup>-1</sup>, C-H stretch; 1632 cm<sup>-1</sup>, C=O stretch sec. amide; 1202 cm<sup>-1</sup>, C-N bend (79)).

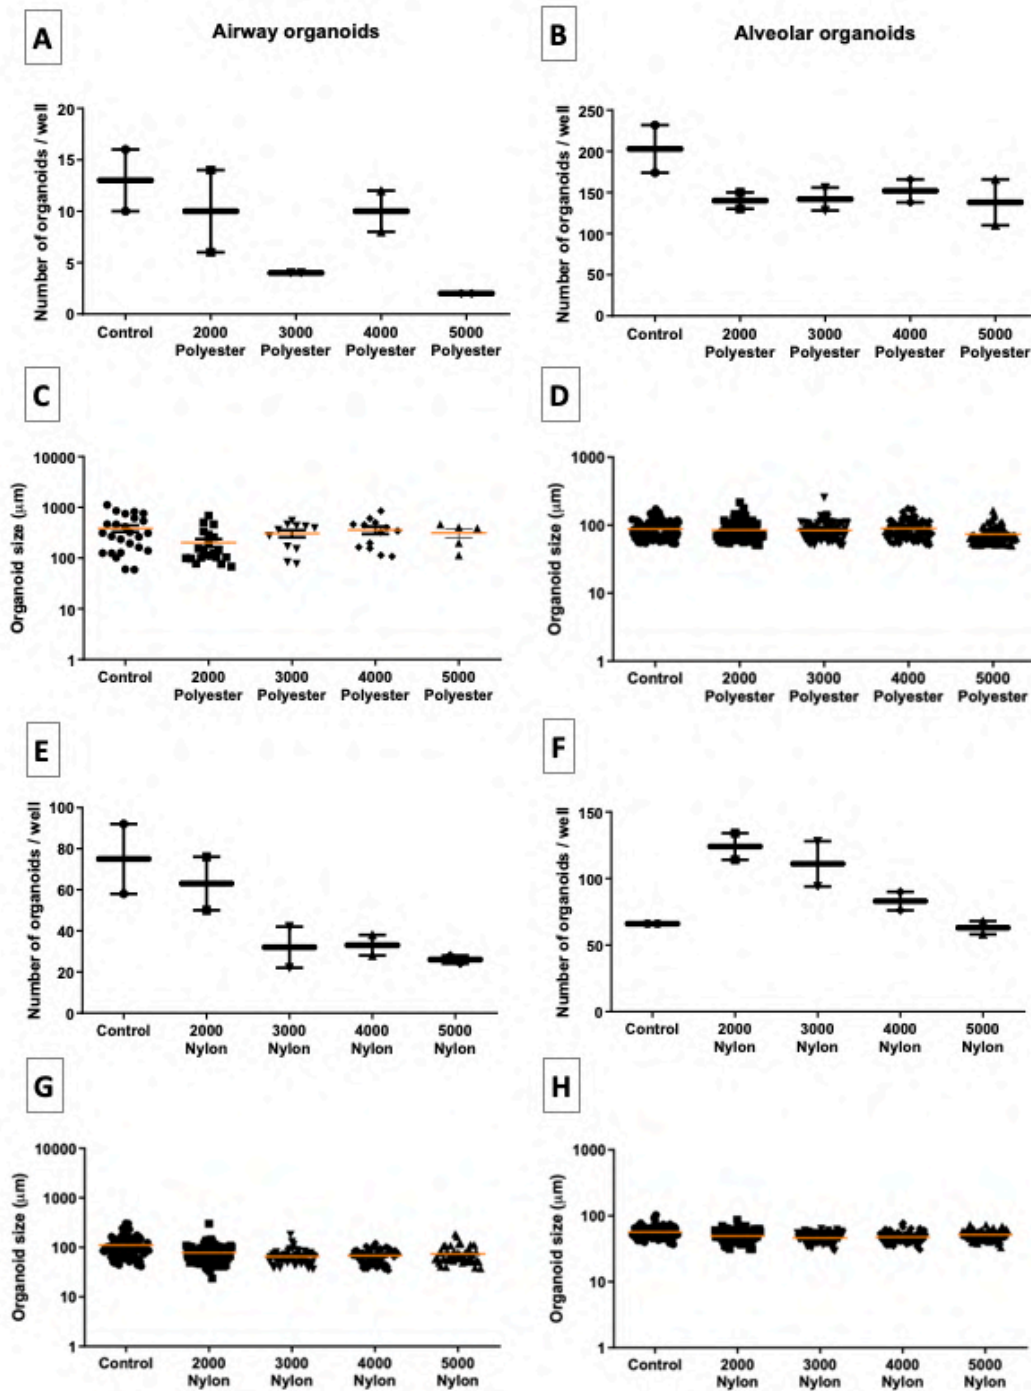

44  
45 **Figure S2: Determination of the optimal microfiber dose for subsequent in vitro testing**  
46 **of polyester and nylon reference microfibers, using 2000, 3000, 4000 and 5000**  
47 **microfibers per condition. (A, E) Quantification of airway and (B, F) alveolar organoid**  
48 **numbers for organoids exposed to polyester or nylon, respectively (n=2 independent**  
49 **isolations). (C, G) Quantification of the airway and (D, H) alveolar organoid size following**  
50 **exposure to polyester or nylon. 2000, 3000, 4000 or 5000 fibers per well corresponded to**



51 approximately 49, 73, 98 and 122  $\mu\text{g/ml}$  of polyester fibers or 16, 23, 31, and 39  $\mu\text{g/ml}$  of  
52 nylon fibers.

53 **Table S2.** Size characteristics of polyester and nylon environmental microfibers.

|                | Microfiber size<br>Diameter x length ( $\mu\text{m}$ ) |                     |
|----------------|--------------------------------------------------------|---------------------|
|                | Environmental polyester                                | Environmental nylon |
| 25% percentile | 15x54                                                  | 46x15               |
| Median         | 17x63                                                  | 57x20               |
| 75% percentile | 18x85                                                  | 73x27               |
| Minimum        | 8x30                                                   | 17x8                |
| Maximum        | 24x269                                                 | 296x66              |

54

55

56



57

58

59

60

**Figure S3: Characterization of the environmental microfibers using energy dispersive X-ray - and infrared spectroscopy. EDX - and  $\mu$ -FTIR spectra of (A and B) polyester and (C and D) nylon microfibers.**

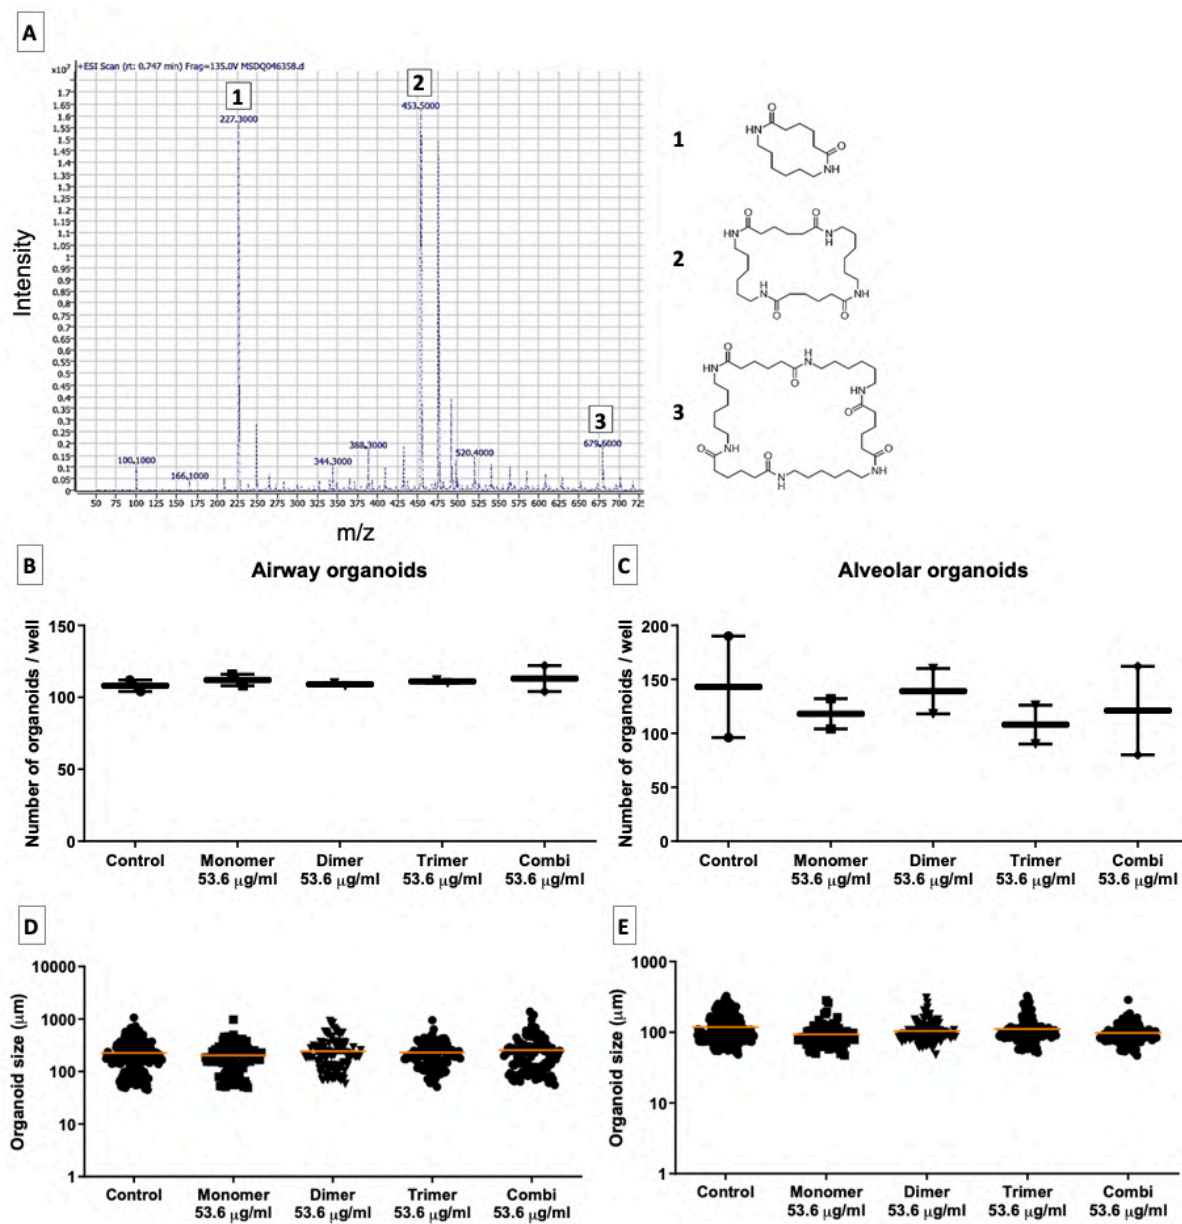

**Figure S4: Characterization of the components leaching from nylon reference microfibers and their effect on organoid growth.** (A) Mass spectrometry spectrum of the nylon leachate, revealing high amounts of cyclic nylon mono-, di- and trimers, as well as other smaller peaks. (B and C) Assessment of the numbers of airway and alveolar organoids and (D and E) their sizes ( $n=2$  independent isolations).

61  
62  
63  
64  
65  
66  
67  
68  
69

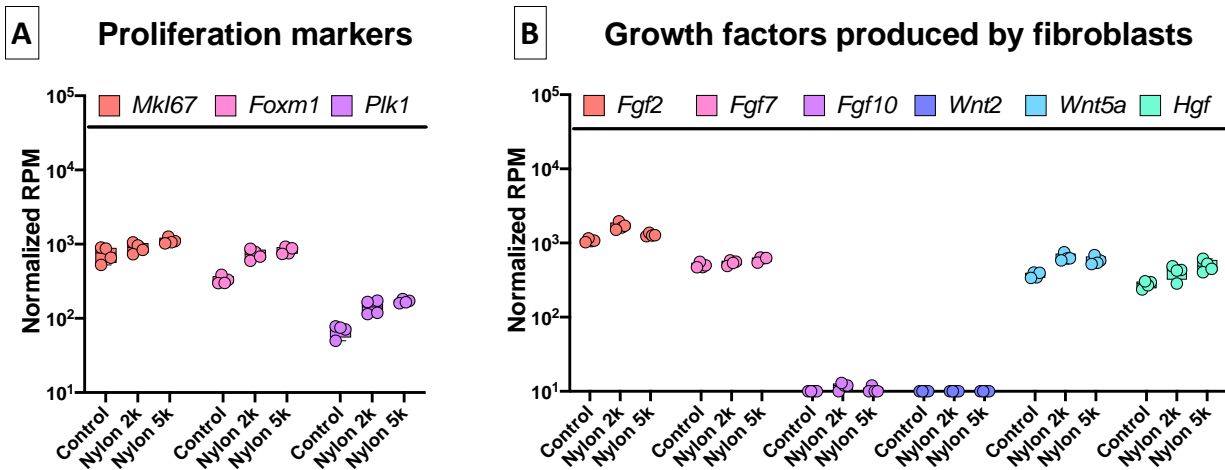

70

71

72

73

74

75

76

77

**Figure S5: Expression of individual genes in fibroblasts isolated from organoid cultures exposed to nylon microfibers. (A) Genes associated with proliferation of fibroblasts. (B) Genes encoding factors produced by fibroblasts important for epithelial development (n=4 independent isolations). 2k= 2000 fibers, 5k=5000 fibers**
